# Supplementary material for: Hutterite‐type cataract maps to chromosome 6p21.32‐p21.31, cosegregates with a homozygous mutation in LEMD2, and is associated with sudden cardiac death
Source: PubMed Central journal article supplement (PMC4707028; doi:10.1002/mgg3.181), 2015-11-14
Supplement: MGG3-4-077-s001.pdf [file MGG3-4-077-s001.pdf]

## Supplement

**Hutterite-type cataract maps to chromosome 6p21.32-p21.31, co-segregates with a homozygous mutation in *LEMD2*, and is associated with sudden cardiac death**

Philip M. Boone, M.D., Ph.D., Bo Yuan, Ph.D., Shen Gu, Ph.D., Zhiwei Ma, M.D., Ph.D., Tomasz Gambin, Ph.D., Claudia Gonzaga-Jauregui, Ph.D., Mahim Jain, M.D., Ph.D., Todd J. Murdock, M.D., Janson J. White, B.S. Shalini N. Jhangiani, M.S., Kimberly Walker, M.S., Qiaoyan Wang, M.A., Donna M. Muzny, M.S., Richard A. Gibbs, Ph.D., J. Fielding Hejtmancik, M.D., Ph.D., James R. Lupski, M.D., Ph.D., Jennifer E. Posey, M.D., Ph.D., Richard Alan Lewis, M.D., M.S.

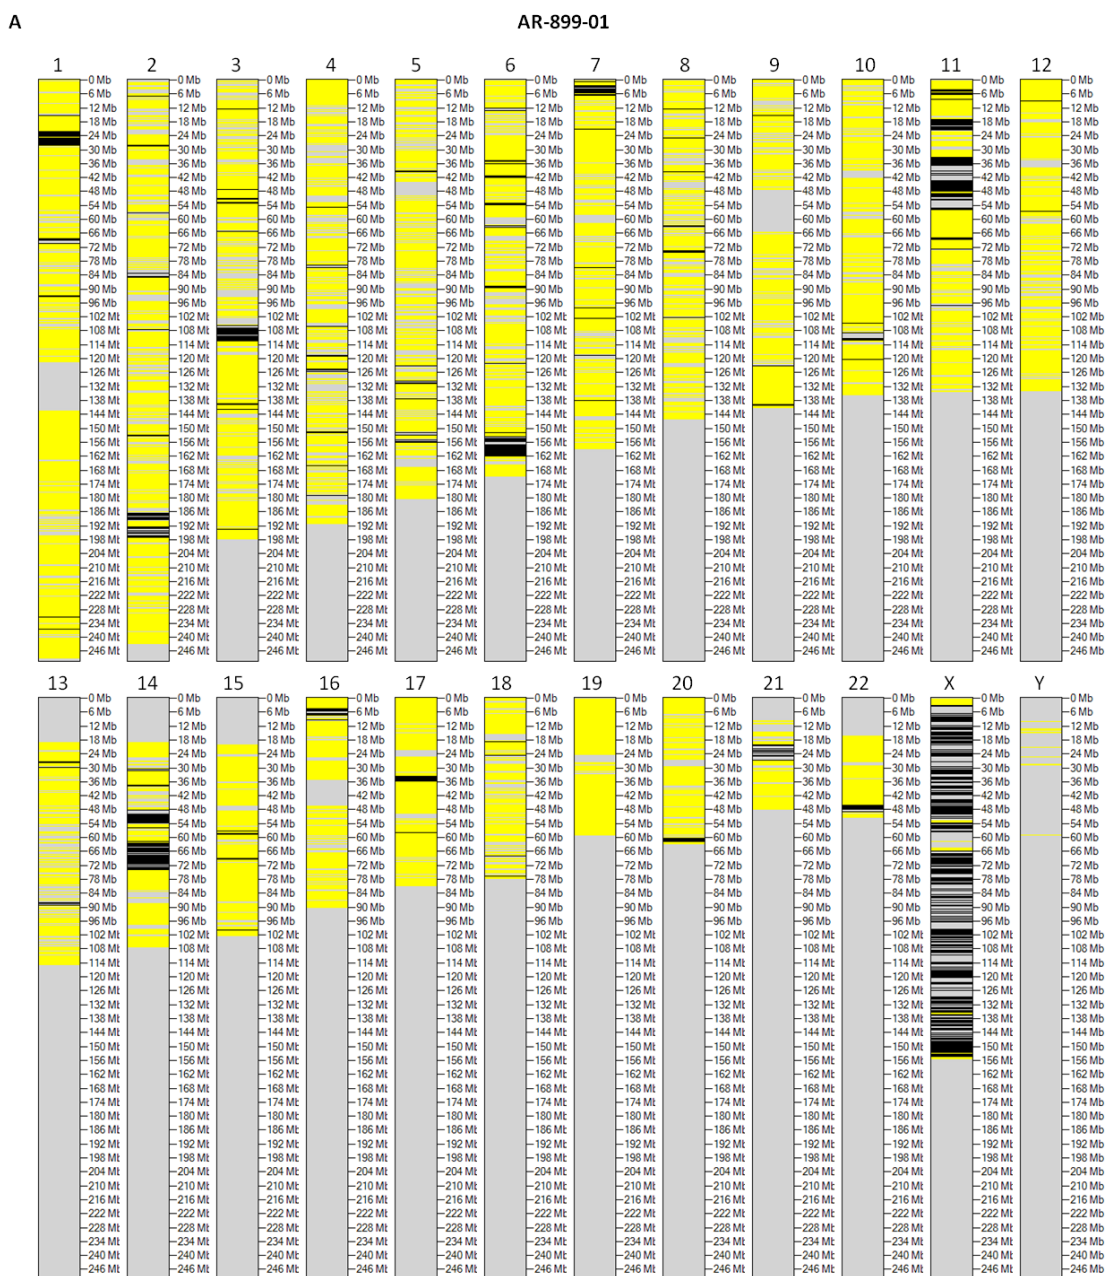

**Figure S1. A single autozygous region segregates with Hutterite-type cataracts, confirming linkage to chromosome 6p22.2-p21.31. a-i.** Regions of autozygosity (black) and heterozygosity (yellow) were determined from exome sequencing variant calls using AgileVariantMapper software.<sup>1</sup> A 9.5 Mb region on chromosome 6 that contains *MUC21* is the only span of absence

of heterozygosity (AOH) shared by all three exome-sequenced, affected individuals (**c, f, i**) and absent from their healthy parents (**a-b, d-e, g-h**).

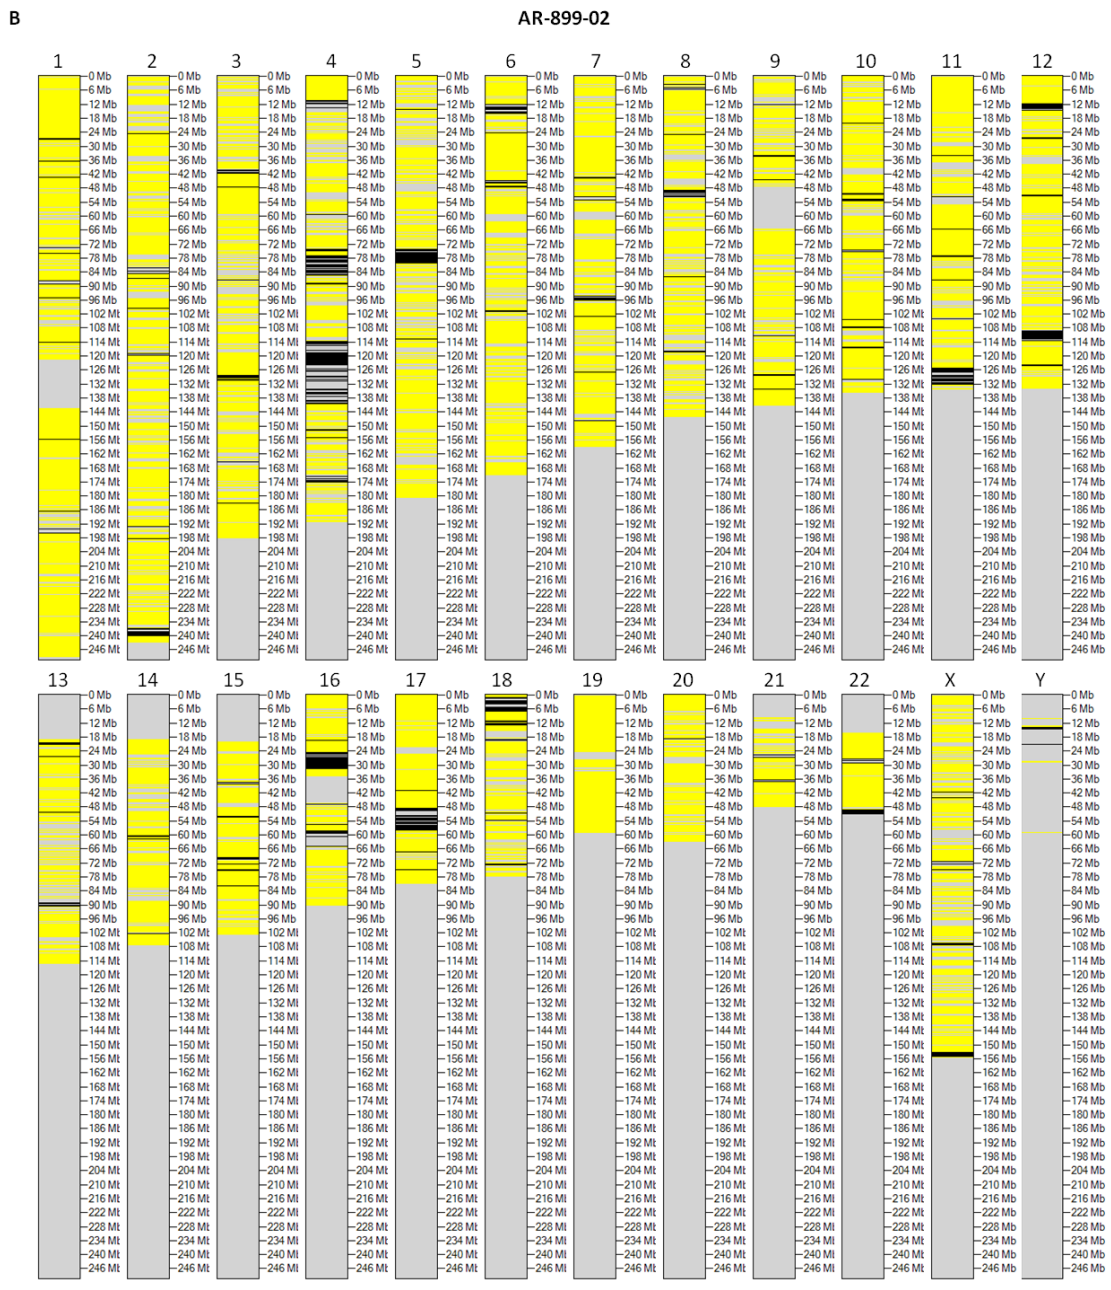

**Figure S1, cont'd.**

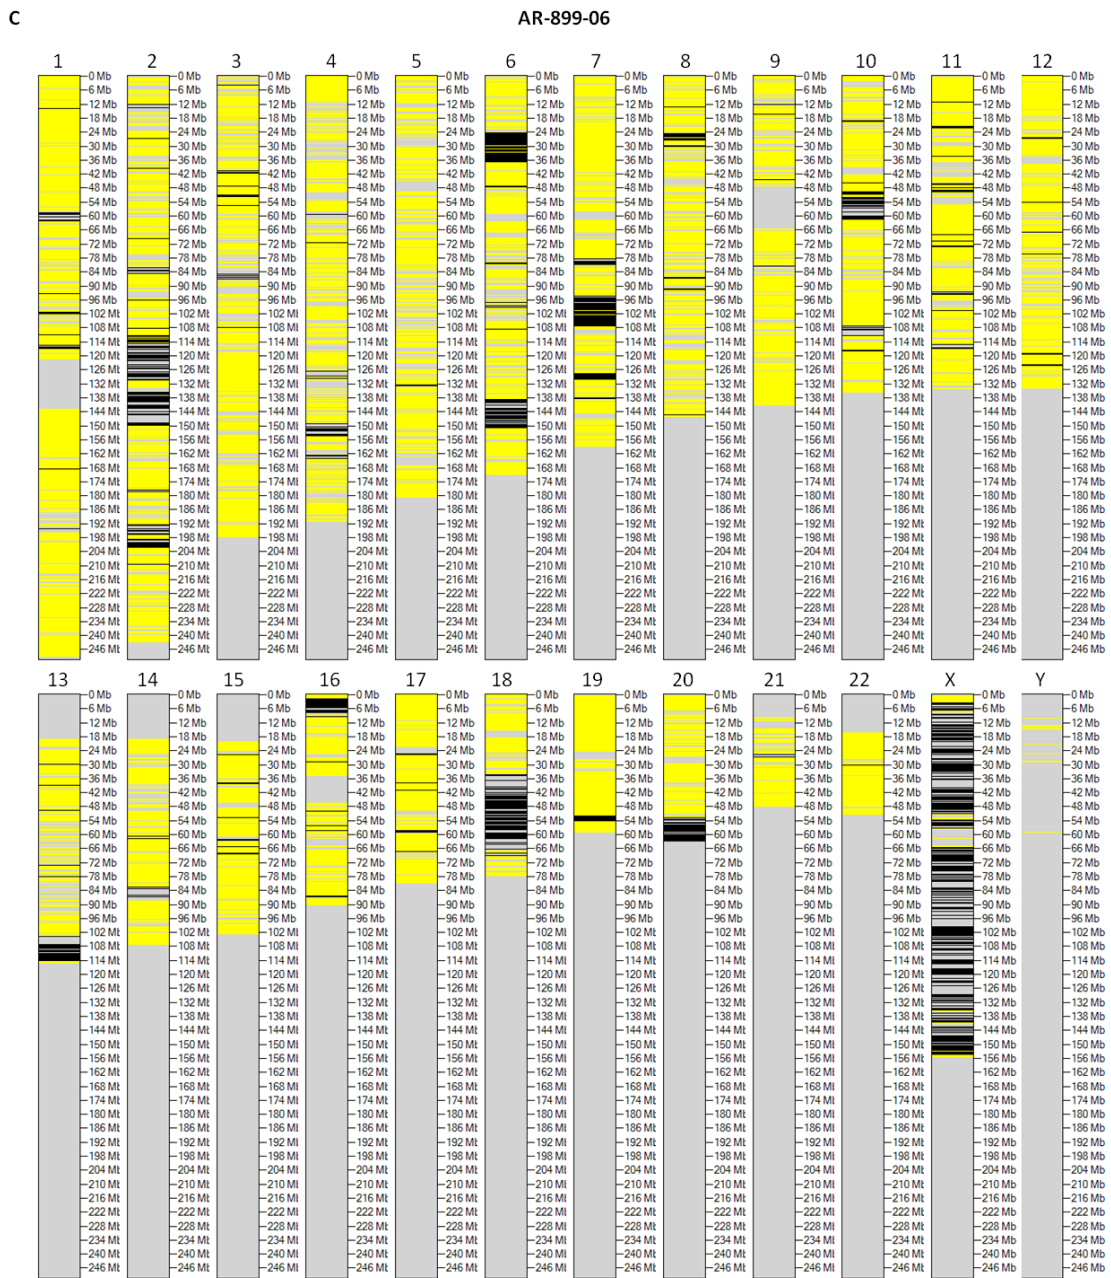

Figure S1, cont'd.

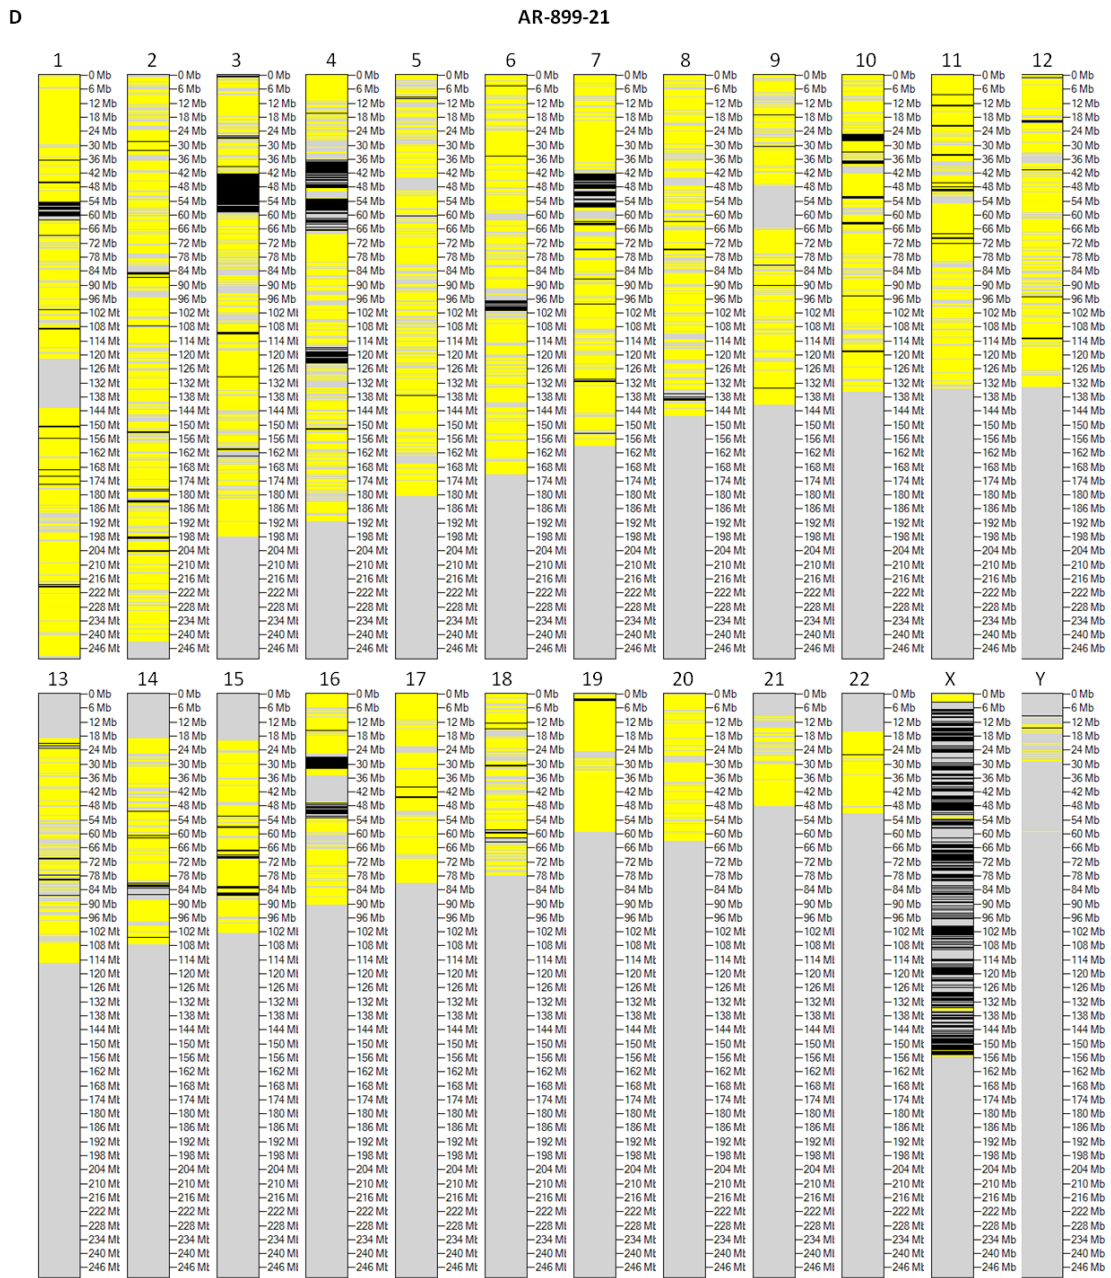

Figure S1, cont'd.

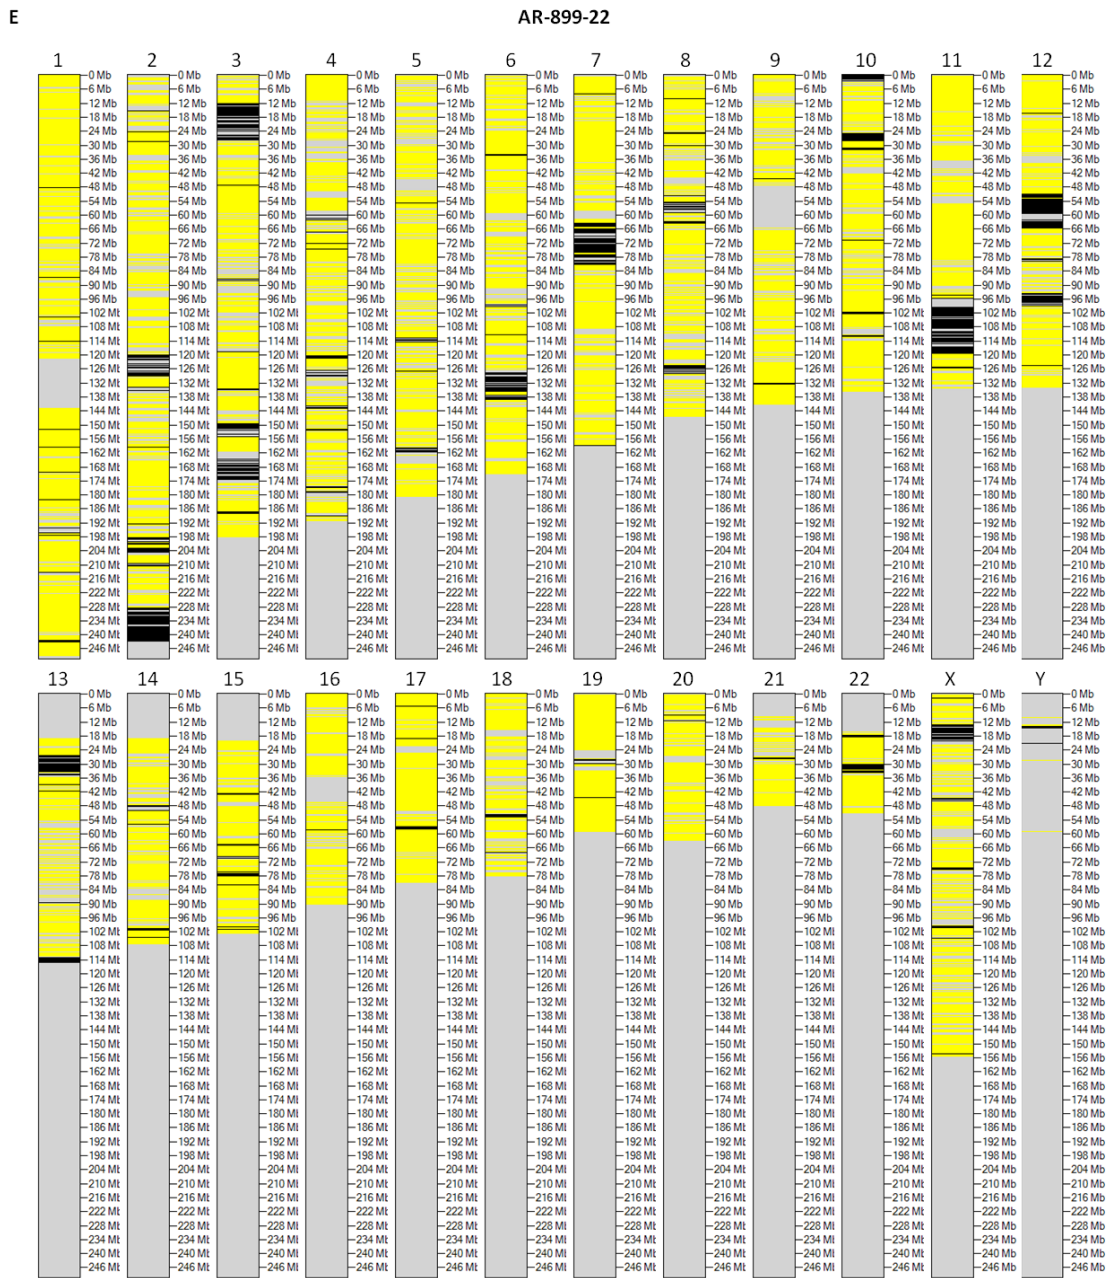

Figure S1, cont'd.

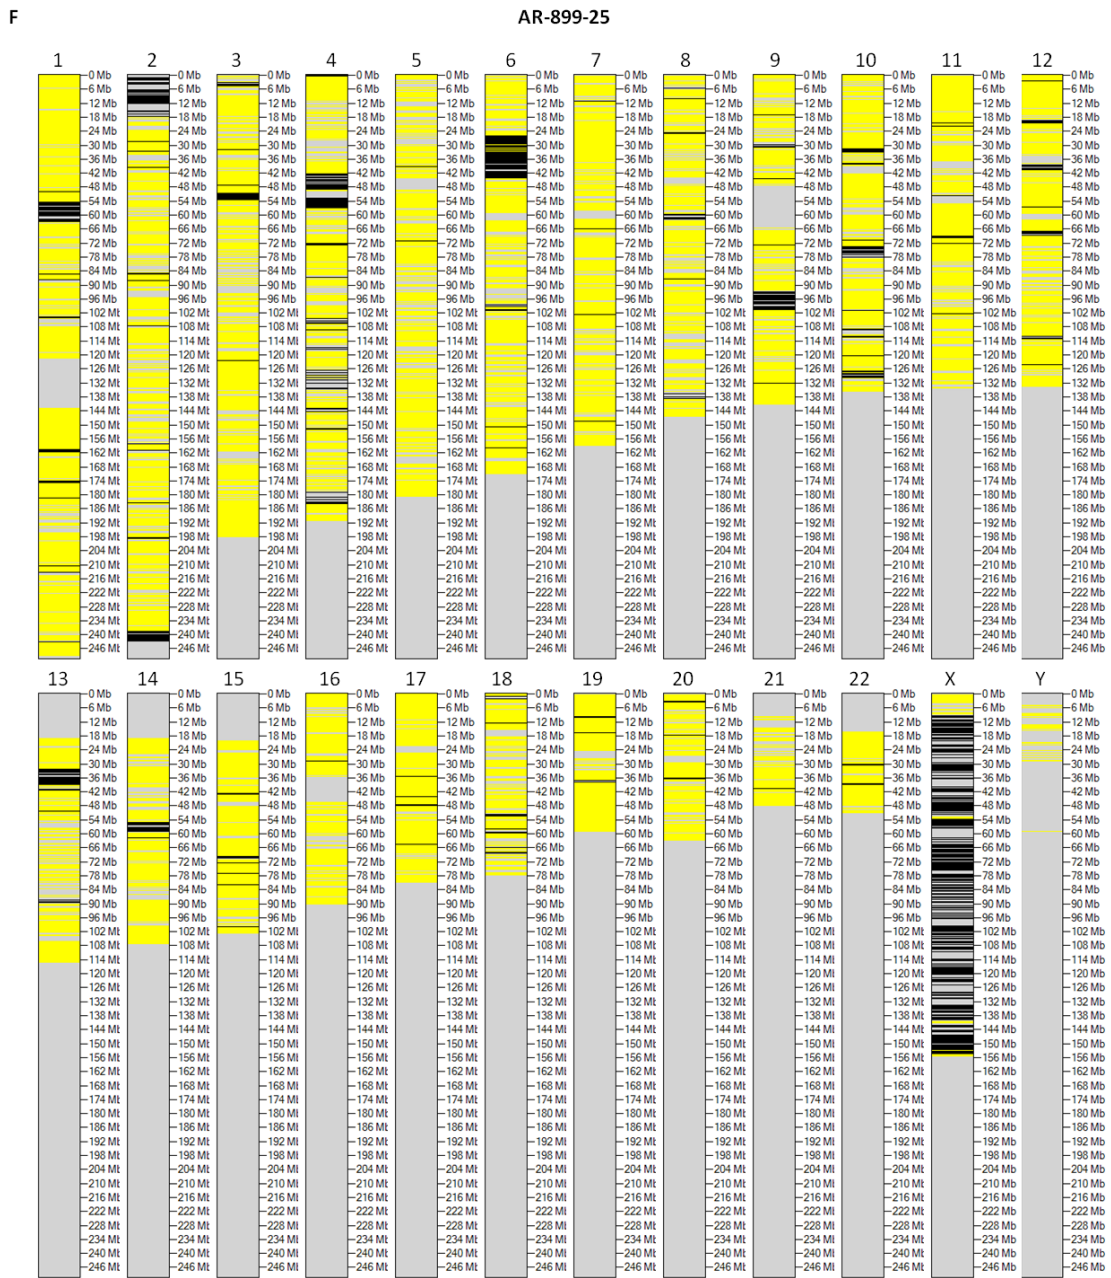

Figure S1, cont'd.



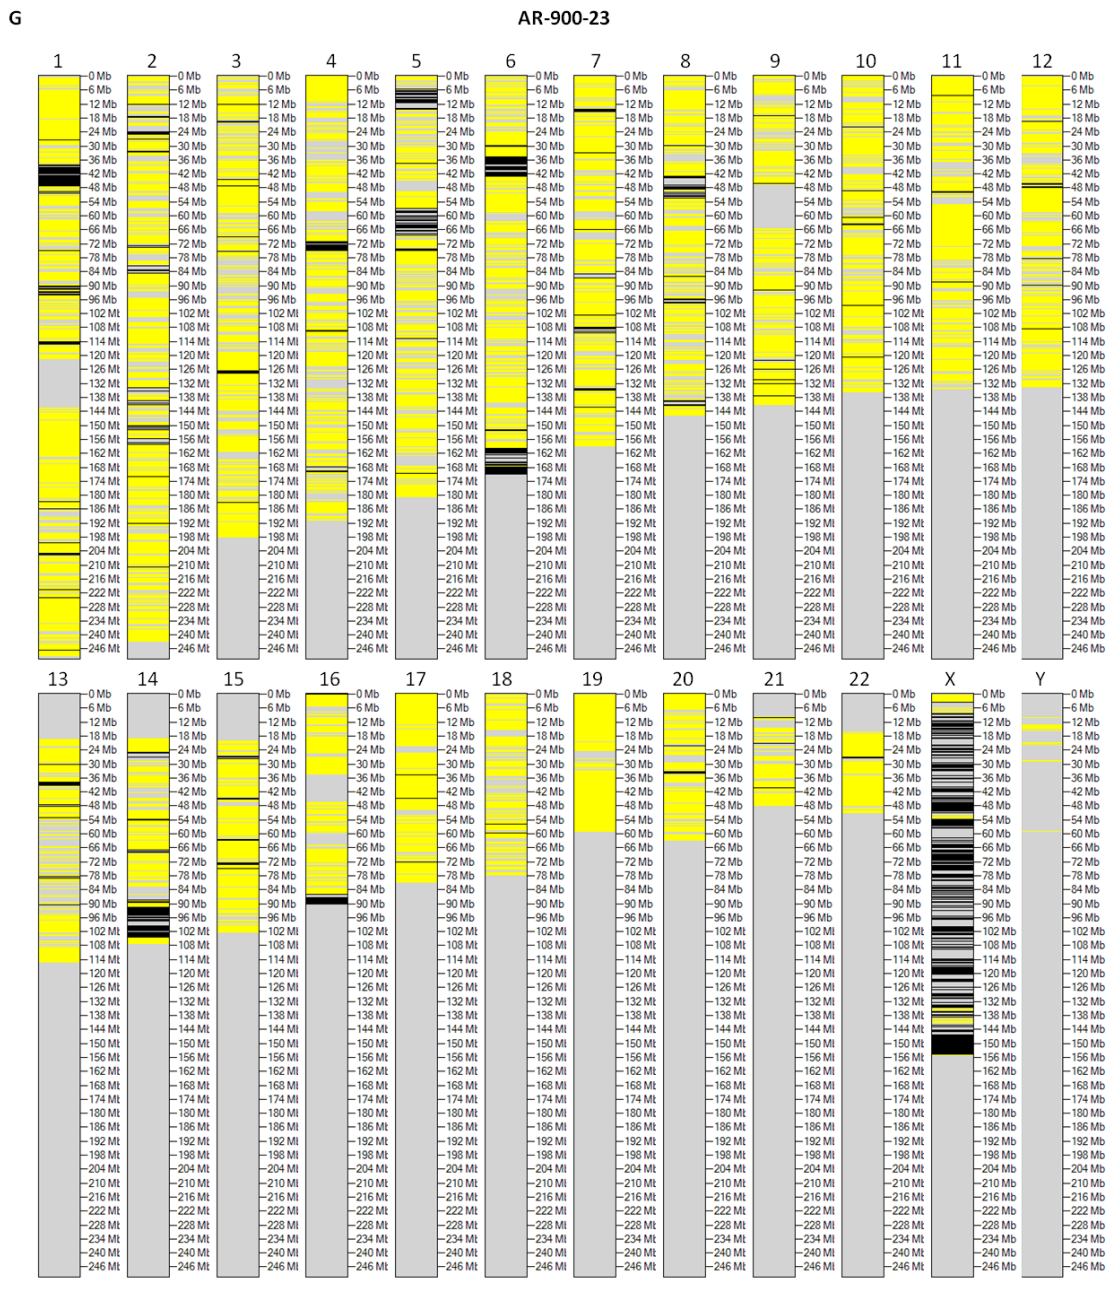

Figure S1, cont'd.

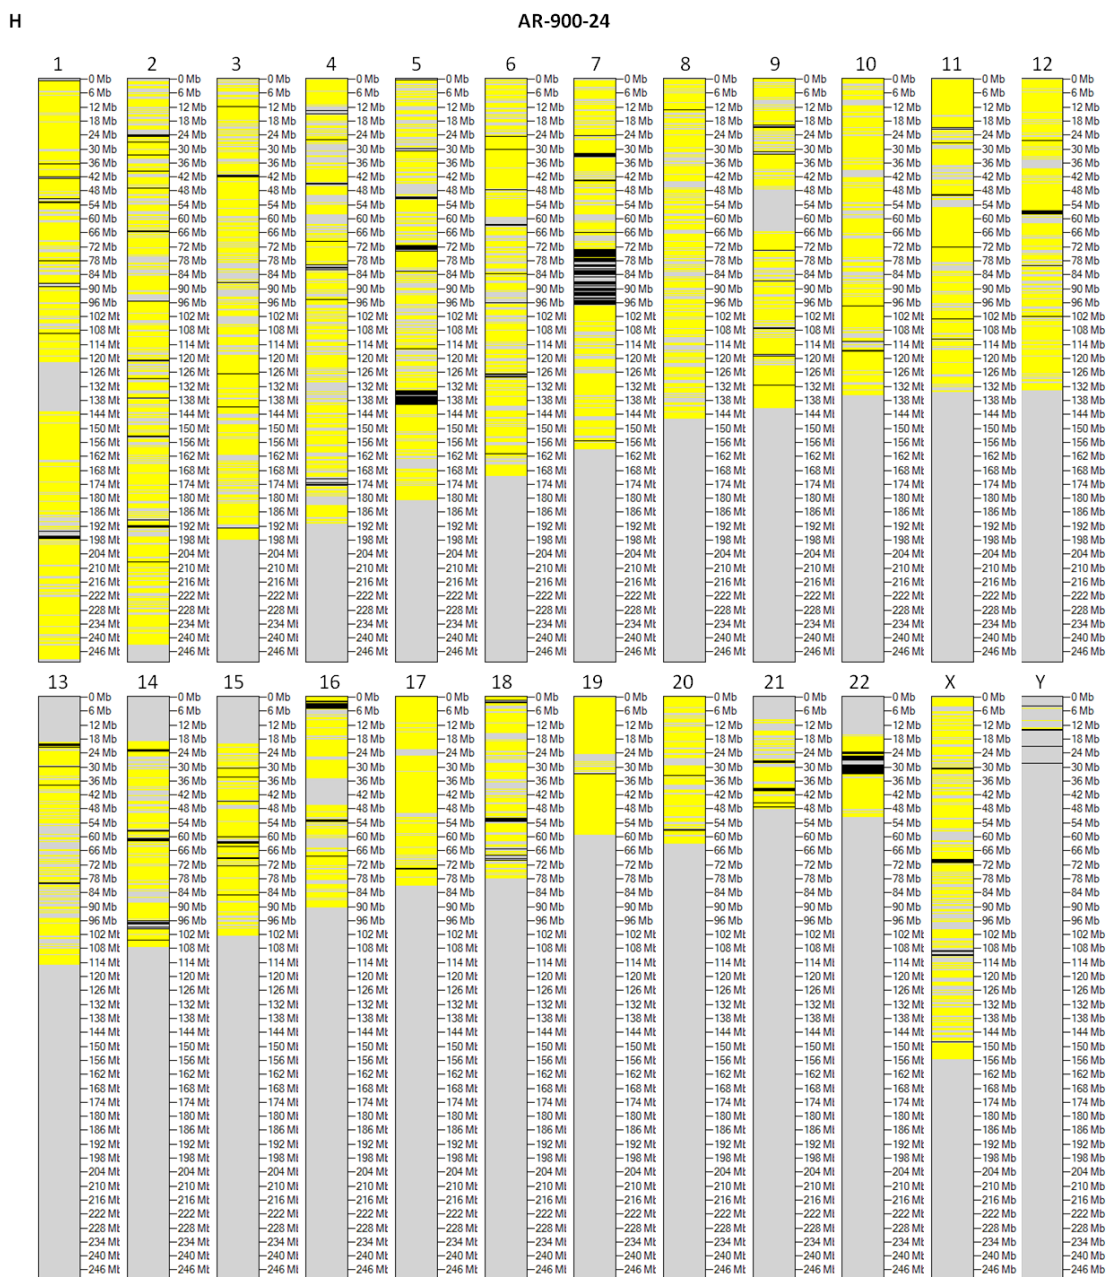

Figure S1, cont'd.

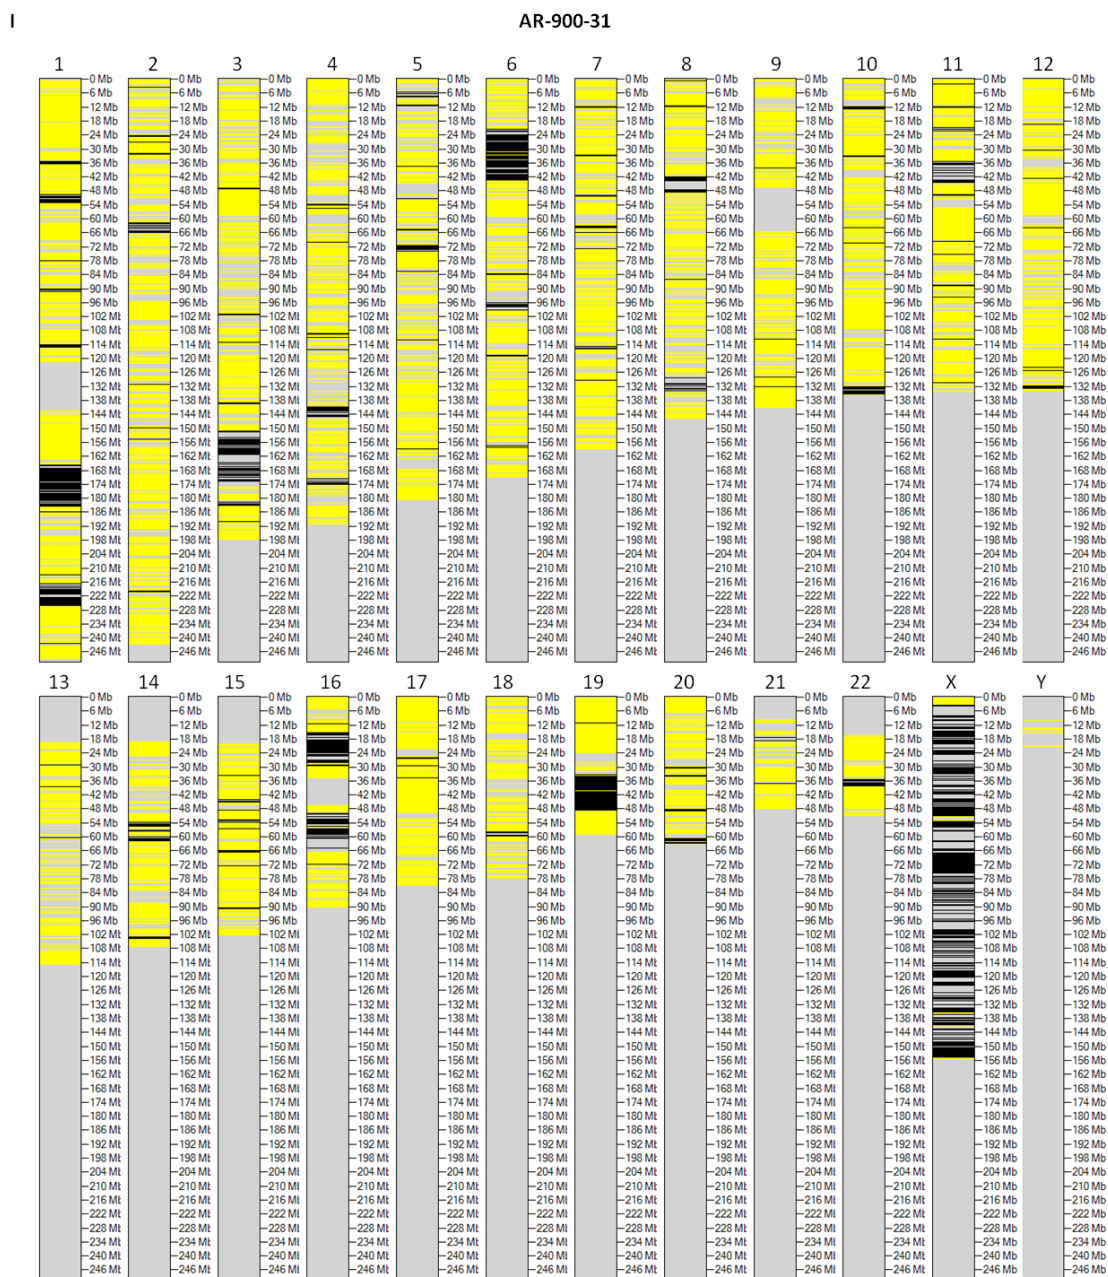

Figure S1, cont'd.

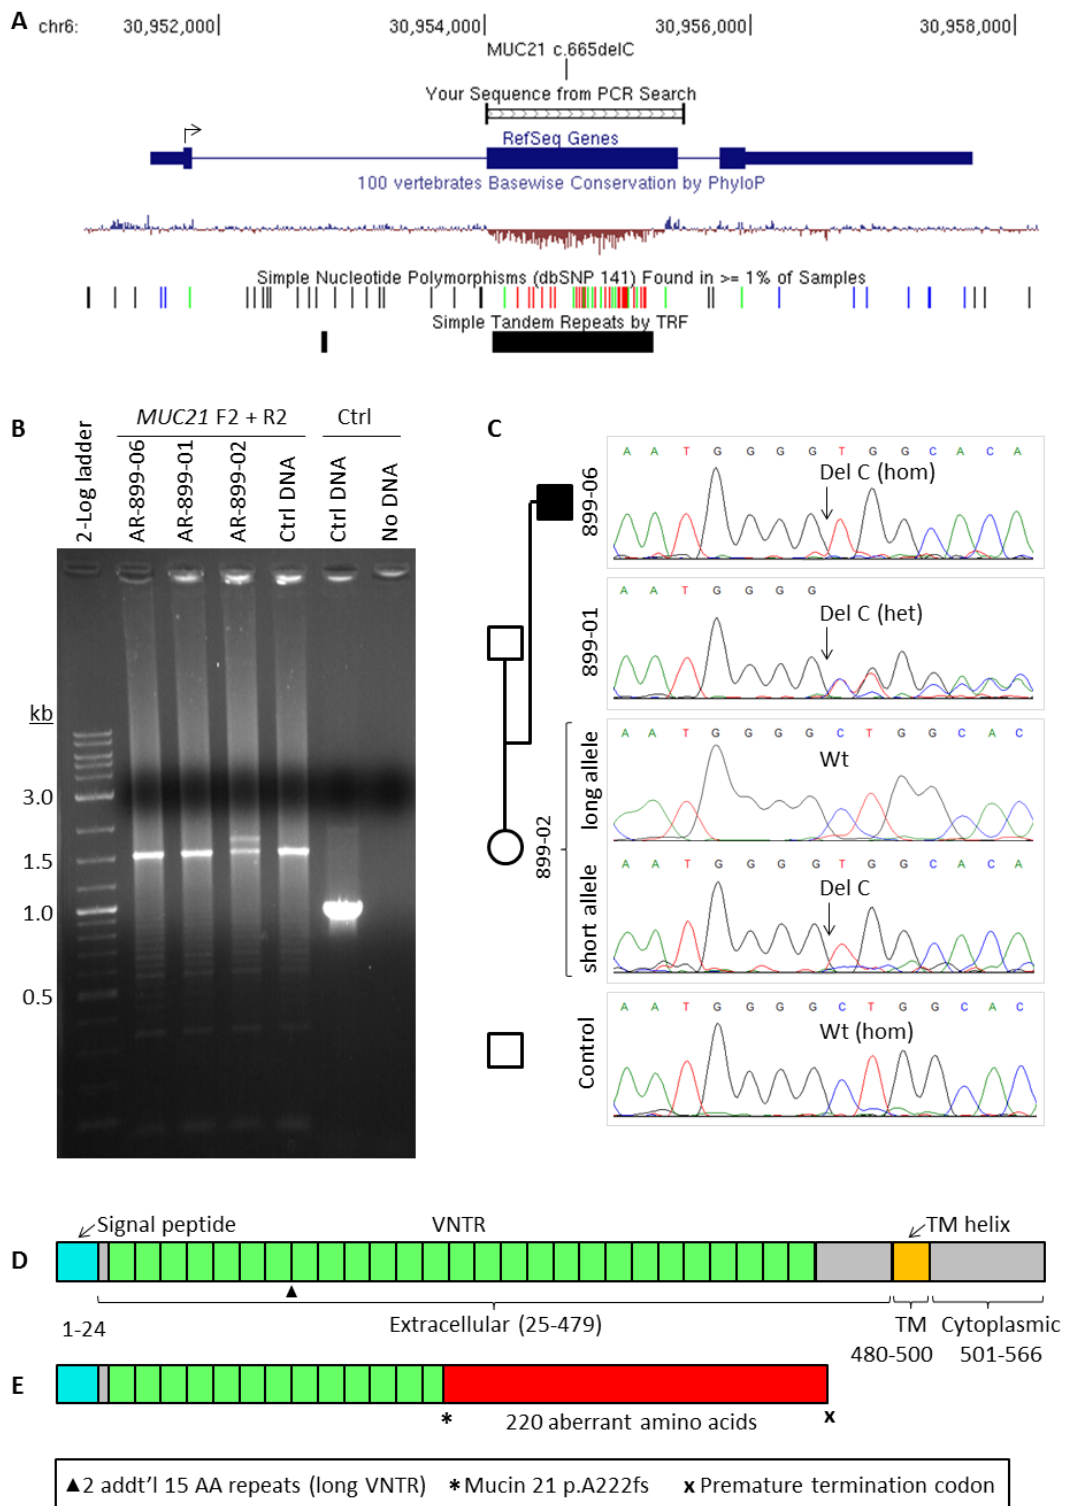

**Figure S2. *MUC21* c.665delC is confirmed by Sanger sequencing and represents a predicted frameshift allele. a. *MUC21* c.665delC falls within a coding VNTR of 27 X 45 bp**

repeats, necessitating a long (1,502 bp) PCR amplicon (“Your Sequence from PCR Search”) to sequence it. **b.** PCR of a trio provides substrate for sequencing and demonstrates that one amplicon in AR-899-02 is 90 bp longer than the other; this represents two additional 45 bp VNTR repeats (see Fig. S3). Note that all lanes show extraneous fast-moving bands with a periodicity of ~45 bp, necessitating gel-extraction of the primary amplicons prior to sequencing. **c.** Sanger sequencing of the *MUC21* c.665delC mutation in this trio confirms its presence and segregation with the phenotype. hom, homozygous; het, heterozygous. **d.** Wild type mucin 21. Number ranges signify amino acid positions. Domain information obtained from EBI Interpro (<http://www.ebi.ac.uk/interpro/protein/Q5SSG8>) and UniProt (<http://www.uniprot.org/uniprot/Q5SSG8>). AA, amino acid. **e.** Predicted effect of the *MUC21* c.665delC (p.A222Vfs\*221) mutation, which introduces a frameshift in the thirteenth of 27 VNTR repeats. The mutation is predicted to introduce 220 aberrant amino acids before introducing a premature termination codon within exon 2 (see also Fig. S3). No specific evidence suggests escape from nonsense mediated decay (the premature termination codon is > 50-55 nucleotides upstream of the final exon-exon junction).<sup>2</sup>

| A | Wildtype (sequence starts at AA 221)            | B | c.665delC/p.A222fs (sequence starts at AA 221)  |
|---|-------------------------------------------------|---|-------------------------------------------------|
|   | ggggcgggcacagccaccaactctgagtccagcagcagcctccagt  |   | ggggcgggcacagccaccaactctgagtccagcagcagcctccagt  |
|   | G A G T A T N S E S S T T S S                   |   | G V A Q P P T L S P A R P P V                   |
|   | ggggccagcacagccaccaactctgagtccagcagcagcctccagt  |   | ggggccagcacagccaccaactctgagtccagcagcagcctccagt  |
|   | G A S T A T N S E S S T P S S                   |   | G P A Q P P T L S P A H P P V                   |
|   | ggggccggcacagccaccaactctgagtccagcagcagcctccagt  |   | ggggccggcacagccaccaactctgagtccagcagcagcctccagt  |
|   | G A G T A T N S E S S T T S S                   |   | G P A Q P P T L S P A R P P V                   |
|   | ggggccggcacagccaccaactctgagtccagcagcagtgctccagt |   | ggggccggcacagccaccaactctgagtccagcagcagtgctccagt |
|   | G A G T A T N S E S S T V S S                   |   | G P A Q P P T L S P A Q C P V                   |
|   | gggatcagcacagtcaccaattctgagtccagcagcagcctccagt  |   | gggatcagcacagtcaccaattctgagtccagcagcagcctccagt  |
|   | G I S T V T N S E S S T P S S                   |   | G S A Q S P I L S P A H P P V                   |
|   | ggggccaacacagccaccaactctgagtccagcagcagcctccagt  |   | ggggccaacacagccaccaactctgagtccagcagcagcctccagt  |
|   | G A N T A T N S E S S T T S S                   |   | G P T Q P P T L S P V R P P V                   |
|   | ggggccaacacagccaccaactctgagtccagcagcagcctccagt  |   | ggggccaacacagccaccaactctgagtccagcagcagcctccagt  |
|   | G A N T A T N S D S S T T S S                   |   | G P T Q P P T L T P A Q P P V                   |
|   | ggggccagcacagccaccaactctgagtccagcagcagcctccagt  |   | ggggccagcacagccaccaactctgagtccagcagcagcctccagt  |
|   | G A S T A T N S E S S T T S S                   |   | G P A Q P P T L S P A R P P V                   |
|   | ggggccagcacagccaccaactctgagtccagcagcagcctccagt  |   | ggggccagcacagccaccaactctgagtccagcagcagcctccagt  |
|   | G A S T A T N S E S S T T S S                   |   | G P A Q P P T L S P A Q P P V                   |
|   | ggggccagcacagccaccaactctgagtccagcagcagcctccagt  |   | ggggccagcacagccaccaactctgagtccagcagcagcctccagt  |
|   | G A S T A T N S E S S T T S S                   |   | G P A Q P P T L S P A Q P P V                   |
|   | ggggccagcacagccaccaactctgagtccagcagcagcctccagt  |   | ggggccagcacagccaccaactctgagtccagcagcagcctccagt  |
|   | G A S T A T N S G S S T T S S                   |   | G P A Q P P T L G P A R P P V                   |
|   | gggaccagcacagccaccaactctgagtccagcagcagtgctccagt |   | gggaccagcacagccaccaactctgagtccagcagcagtgctccagt |
|   | G T S T A T N S E S S T V S S                   |   | G P A Q P P T L S P A Q C P V                   |
|   | ggggccagcacagccaccactctgagtccagcagcagcctccagt   |   | ggggccagcacagccaccactctgagtccagcagcagcctccagt   |
|   | G A S T A T T S E S S T T S S                   |   | G P A Q P P P L S P A R P P V                   |
|   | ggggccagcacagccaccaactctgagtccagcagcagtgctccagt |   | ggggccagcacagccaccaactctgagtccagcagcagtgctccagt |
|   | G A S T A T N S E S S T V S S                   |   | G P A Q P P T L S P A Q C P V                   |
|   | ggggccagcactgccaccaattctgagtccagcagcagcctccagt  |   | ggggccagcactgccaccaattctgagtccagcagcagcctccagt  |
|   | G A S T A T N S E S S T T S S                   |   | G P A L P P I L S P A Q P P V                   |
|   | ggggccaacacagccaccaactctgggtccagtg...           |   | ggggccaacacagccaccaactctgggtccagtg...           |
|   | G A N T A T N S G S S V...                      |   | G P T Q P P T L G P V STOP                      |

**Figure S3. Predicted translational effect of *MUC21* c.665delC.** The c.665delC mutation resides within the mucin domain-encoding portion of *MUC21*, composed of non-identical 45 bp (15 amino acid) repeats. **a.** Wild type sequence beginning with amino acid 221. The C base deleted in the mutant is shaded in green. 15 amino acids are shown per line, highlighting the mucin domain repeat structure. AA, amino acid. **b.** The mutation deletes a single C, altering amino acid 222 and the subsequent 219 amino acids. A premature stop codon (red) follows amino acid 441, just after the mucin repeats have ended.

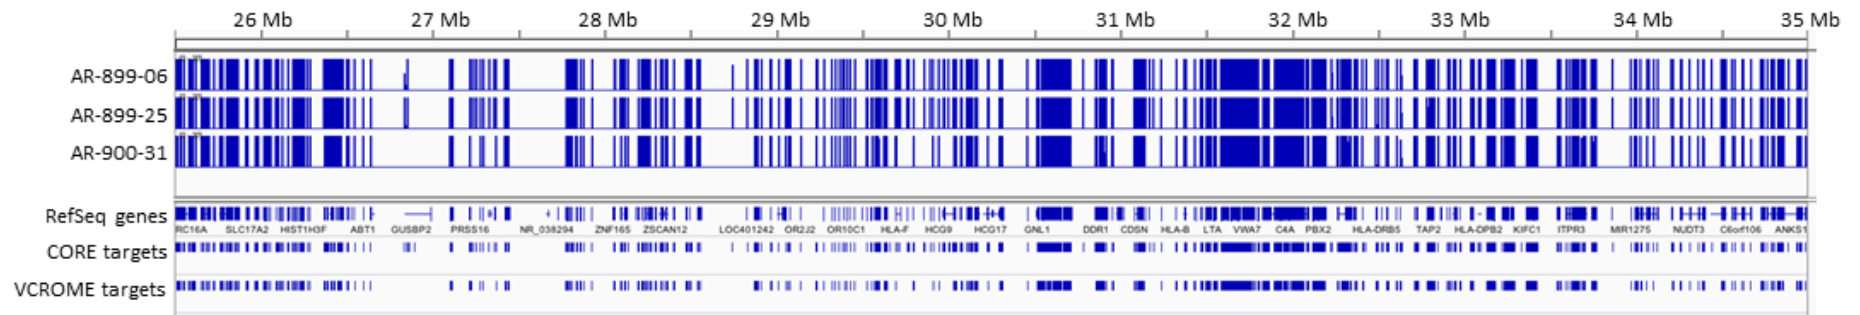

**Figure S4. The vast majority of exons within the 9.5 Mb linked region are covered  $\geq 20X$ .** **Top:** Coverage over the 9.5 Mb chromosome 6 linked region in the three affected, exome sequenced individuals, with a y-axis limit of 20X. The vast majority of exons are covered  $\geq 20X$ . **Bottom:** RefSeq genes, as well as targets of the CORE capture reagent (used for AR-899-06 and AR-899-25) and VCROME capture reagent (used for AR-900-31).

| Wild type                                                                                                                                                                                                                                                                                                                                                                                                                                                                                                                                                                                                                                                                                                                                                                                                                                                                                                                                                                                                                                                                                                                                                                                                                                                                                                                                                                                                                                                                                                                                                                                                                                                                                                                                                                                                                                                                                                                                                                                                                                                                                                        | Mutant (c.665delC)                                                                                                                                                                                                                                                                                                                                                                                                                                                                                                                                                                                                                                                                                                                                                                                                                                                                                                                                                                                                                                                                                                                                                                                                                                                                                                                                                                                                                                                                                                                                                                                                                                                                                                                                                                                                                                                                                                                                                                                                                                                                                                                                                                                                                                                           | "Long" wild type allele (+90 bp)                                                                                                                                                                                                                                                                                                                                                                                                                                                                                                                                                                                                                                                                                                                                                                                                                                                                                                                                                                                                                                                                                                                                                                                                                                                                                                                                                                                                                                                                                                                                                                                                                                                                                                                                                                                                                                                                                                                                                                                                         |
|------------------------------------------------------------------------------------------------------------------------------------------------------------------------------------------------------------------------------------------------------------------------------------------------------------------------------------------------------------------------------------------------------------------------------------------------------------------------------------------------------------------------------------------------------------------------------------------------------------------------------------------------------------------------------------------------------------------------------------------------------------------------------------------------------------------------------------------------------------------------------------------------------------------------------------------------------------------------------------------------------------------------------------------------------------------------------------------------------------------------------------------------------------------------------------------------------------------------------------------------------------------------------------------------------------------------------------------------------------------------------------------------------------------------------------------------------------------------------------------------------------------------------------------------------------------------------------------------------------------------------------------------------------------------------------------------------------------------------------------------------------------------------------------------------------------------------------------------------------------------------------------------------------------------------------------------------------------------------------------------------------------------------------------------------------------------------------------------------------------|------------------------------------------------------------------------------------------------------------------------------------------------------------------------------------------------------------------------------------------------------------------------------------------------------------------------------------------------------------------------------------------------------------------------------------------------------------------------------------------------------------------------------------------------------------------------------------------------------------------------------------------------------------------------------------------------------------------------------------------------------------------------------------------------------------------------------------------------------------------------------------------------------------------------------------------------------------------------------------------------------------------------------------------------------------------------------------------------------------------------------------------------------------------------------------------------------------------------------------------------------------------------------------------------------------------------------------------------------------------------------------------------------------------------------------------------------------------------------------------------------------------------------------------------------------------------------------------------------------------------------------------------------------------------------------------------------------------------------------------------------------------------------------------------------------------------------------------------------------------------------------------------------------------------------------------------------------------------------------------------------------------------------------------------------------------------------------------------------------------------------------------------------------------------------------------------------------------------------------------------------------------------------|------------------------------------------------------------------------------------------------------------------------------------------------------------------------------------------------------------------------------------------------------------------------------------------------------------------------------------------------------------------------------------------------------------------------------------------------------------------------------------------------------------------------------------------------------------------------------------------------------------------------------------------------------------------------------------------------------------------------------------------------------------------------------------------------------------------------------------------------------------------------------------------------------------------------------------------------------------------------------------------------------------------------------------------------------------------------------------------------------------------------------------------------------------------------------------------------------------------------------------------------------------------------------------------------------------------------------------------------------------------------------------------------------------------------------------------------------------------------------------------------------------------------------------------------------------------------------------------------------------------------------------------------------------------------------------------------------------------------------------------------------------------------------------------------------------------------------------------------------------------------------------------------------------------------------------------------------------------------------------------------------------------------------------------|
| <p><b>TTCAGCAACAAATTC</b><u>CAATGAGACTAGCACCTCT</u><br/> <u>GCCAACTGGATCCAGTGTGATCTCCAGTGGAGCCAGCACAGCC</u><br/> <u>ACCAACTCTGGGTCCAGTGTGACCTCCAGTGGGGTCAGCACAGCC</u><br/> <u>ACCATCTCAGGGTCCAGCGTGACCTCCAATGGGGTCAGCATAGTC</u><br/> <u>ACCAACTCTGAGTTCCATACAACCTCCAGTGGGATCAGCACAGCC</u><br/> <u>ACCAACTCTGAGTTCCAGCACAG</u><b>CGT</b><u>CCAGTGGGATCAGCATAGCC</u><br/> <u>ACCAACTCTGAGTCCAGCACAACTCCAGTGGGGCCAGCACAGCC</u><br/> <u>ACCAACTCTGAGTCCAGCACACCTCCAGTGGGGCCAGCACAGCC</u><br/> <u>ACCAACTCTGACTCCAGCACAACTCCAGTGGGGCTAGCACAGCC</u><br/> <u>ACCAACTCTGACTCCAGCACAACTCCAGTGGGGCCAGCACAGCC</u><br/> <u>ACCAACTCTGAGTCCAGCACAACTCCAGTGGGGCCAGCACAGCC</u><br/> <u>ACCAACTCTGAGTCCAGCACAGTGTCCAGTAGGGCCAGCACTGCC</u><br/> <u>ACCAACTCTGAGTCCAGCACAACTCCAGTGGGGCCAGCACAGCC</u><br/> <u>ACCAACTCTGAGTCCAGCACAACTCCAGTGGGGCCAGCACAGCC</u><br/> <u>ACCAACTCTGAGTCCAGAACGACCTCCAATGGGGCTGGCACAGCC</u><br/> <u>ACCAACTCTGAGTCCAGCACGACCTCCAGTGGGGCCAGCACAGCC</u><br/> <u>ACCAACTCTGAGTCCAGCACACCTCCAGTGGGGCCGGCACAGCC</u><br/> <u>ACCAACTCTGAGTCCAGCACGACCTCCAGTGGGGCCGGCACAGCC</u><br/> <u>ACCAACTCTGAGTCCAGCACAGTGTCCAGTGGGATCAGCACAGTC</u><br/> <u>ACCAATCTGAGTCCAGCACACCTCCAGTGGGGCCAACACAGCC</u><br/> <u>ACCAACTCTGAGTCCAGTACGACCTCCAGTGGGGCCAACACAGCC</u><br/> <u>ACCAACTCTGACTCCAGCACAACTCCAGTGGGGCCAGCACAGCC</u><br/> <u>ACCAACTCTGAGTCCAGCACGACCTCCAGTGGGGCCAGCACAGCC</u><br/> <u>ACCAACTCTGAGTCCAGCACAA</u><b>CT</b><u>CCAGTGGGGCCAGCACAGCC</u><br/> <u>ACCAACTCTGGGTCCAGCACGACCTCCAGTGGGACCAGCACAGCC</u><br/> <u>ACCAACTCTGAGTCCAGCACAGTGTCCAGTGGGGCCAGCACAGCC</u><br/> <u>ACCACCTCTGAGTCCAGCACGACCTCCAGTGGGGCCAGCACAGCC</u><br/> <u>ACCAACTCTGAGTCCAGCACAGTGTCCAGTGGGGCCAGCACTGCC</u><br/> <u>ACCAATCTGAGTCCAGCACAACTCCAGTGGGGCCAACACAGCC</u><br/> <u>ACCAACTCTGGGTCCAGTGTGACCTCTGCAGGCTCTGGAACAGCA</u><br/> <u>GCTCTGACTGGAATGCACACAAC</u><u>TCCCATAGTGCATCTACTGCA</u><br/> <u>GTGAGTGAGGCGAAGCCTGGTGGGTCCCTGGTGCCGTGGGAAATC</u><br/> <u>TTCTTCATCACCCCTGGTCTCGGTTGTGGCGGCCGTGGGGCTCTTT</u><br/> <u>GCTGGGCTCTTCTTCTGTGTGGTGTGAGTGCCATAATGTGAAGAAAA</u><br/> <u>TGCCTGGGGGAAGGAGCAGCAGAAACAC</u></p> | <p><b>TTCAGCAACAAATTC</b><u>CAATGAGACTAGCACCTCT</u><br/> <u>GCCAACTGGATCCAGTGTGATCTCCAGTGGAGCCAGCACAGCC</u><br/> <u>ACCAACTCTGGGTCCAGTGTGACCTCCAGTGGGGTCAGCACAGCC</u><br/> <u>ACCATCTCAGGGTCCAGCGTGACCTCCAATGGGGTCAGCATAGTC</u><br/> <u>ACCAACTCTGAGTTCCATACAACCTCCAGTGGGATCAGCACAGCC</u><br/> <u>ACCAACTCTGAGTTCCAGCACAGTGTCCAGTGGGATCAGCATAGCC</u><br/> <u>ACCAACTCTGAGTCCAGCACAACTCCAGTGGGGCCAGCACAGCC</u><br/> <u>ACCAACTCTGAGTCCAGCACACCTCCAGTGGGGCCAGCACAGCC</u><br/> <u>ACCAACTCTGAGTCCAGCACACCTCCAGTGGGGCCAGCACAGCC</u><br/> <u>ACCAACTCTGACTCCAGCACAACTCCAGTGGGGCTAGCACAGCC</u><br/> <u>ACCAACTCTGACTCCAGCACAACTCCAGTGGGGCCAGCACAGCC</u><br/> <u>ACCAACTCTGAGTCCAGCACAACTCCAGTGGGGCCAGCACAGCC</u><br/> <u>ACCAACTCTGAGTCCAGCACAGTGTCCAGTAGGGCCAGCACTGCC</u><br/> <u>ACCAACTCTGAGTCCAGCACAGTGTCCAGTGGGGCCAGCACAGTC</u><br/> <u>ACCAATCTGAGTCCAGCACACCTCCAGTGGGGCCAACACAGCC</u><br/> <u>ACCAACTCTGAGTCCAGTACGACCTCCAGTGGGGCCAACACAGCC</u><br/> <u>ACCAACTCTGACTCCAGCACAACTCCAGTGGGGCCAGCACAGCC</u><br/> <u>ACCAACTCTGAGTCCAGCACGACCTCCAGTGGGGCCAGCACAGCC</u><br/> <u>ACCAACTCTGAGTCCAGCACAGTGTCCAGTGGGATCAGCACAGTC</u><br/> <u>ACCAATCTGAGTCCAGCACACCTCCAGTGGGGCCAACACAGCC</u><br/> <u>ACCAACTCTGAGTCCAGTACGACCTCCAGTGGGGCCAACACAGCC</u><br/> <u>ACCAACTCTGACTCCAGCACAACTCCAGTGGGGCCAGCACAGCC</u><br/> <u>ACCAACTCTGAGTCCAGCACGACCTCCAGTGGGGCCGGCACAGCC</u><br/> <u>ACCAACTCTGAGTCCAGCACAGTGTCCAGTGGGATCAGCACAGTC</u><br/> <u>ACCAATCTGAGTCCAGCACACCTCCAGTGGGGCCAACACAGCC</u><br/> <u>ACCAACTCTGAGTCCAGTACGACCTCCAGTGGGGCCAACACAGCC</u><br/> <u>ACCAACTCTGACTCCAGCACAACTCCAGTGGGGCCAGCACAGCC</u><br/> <u>ACCAACTCTGAGTCCAGCACGACCTCCAGTGGGGCCAGCACAGCC</u><br/> <u>ACCAACTCTGAGTCCAGCACAGTGTCCAGTGGGGCCAGCACAGCC</u><br/> <u>ACCACCTCTGAGTCCAGCACGACCTCCAGTGGGGCCAGCACAGCC</u><br/> <u>ACCAACTCTGAGTCCAGCACAGTGTCCAGTGGGGCCAGCACTGCC</u><br/> <u>ACCAATCTGAGTCCAGCACAACTCCAGTGGGGCCAACACAGCC</u><br/> <u>ACCAACTCTGGGTCCAGTGTGACCTCTGCAGGCTCTGGAACAGCA</u><br/> <u>GCTCTGACTGGAATGCACACAAC</u><u>TCCCATAGTGCATCTACTGCA</u><br/> <u>GTGAGTGAGGCGAAGCCTGGTGGGTCCCTGGTGCCGTGGGAAATC</u><br/> <u>TTCTTCATCACCCCTGGTCTCGGTTGTGGCGGCCGTGGGGCTCTTT</u><br/> <u>GCTGGGCTCTTCTTCTGTGTGGTGTGAGTGCCATAATGTGAAGAAAA</u><br/> <u>TGC</u><b>T</b><u>GGGGGAAGGAGCAGCAGAAACAC</u></p> | <p><b>TTCAGCAACAAATTC</b><u>CAATGAGACTAGCACCTCT</u><br/> <u>GCCAACTGGATCCAGTGTGATCTCCAGTGGAGCCAGCACAGCC</u><br/> <u>ACCAACTCTGGGTCCAGTGTGACCTCCAGTGGGGTCAGCACAGCC</u><br/> <u>ACCATCTCAGGGTCCAGCGTGACCTCCAATGGGGTCAGCATAGTC</u><br/> <u>ACCAACTCTGAGTTCCATACAACCTCCAGTGGGATCAGCACAGCC</u><br/> <u>ACCAACTCTGAGTTCCAGCACAG</u><b>CGT</b><u>CCAGTGGGATCAGCATAGCC</u><br/> <u>ACCAACTCTGAGTCCAGCACAACTCCAGTGGGGCCAGCACAGCC</u><br/> <u>ACCAACTCTGAGTCCAGCACAACTCCAGTGGGGCCAGCACAGTC</u><br/> <u>ACCAACTCTGGGTCCAGTGTGACCTCCAGTGGAGCCAGCACTGCC</u><br/> <u>ACCAACTCTGAGTCCAGCACAGTGTCCAGTAGGGCCAGCACTGCC</u><br/> <u>ACCAACTCTGACTCCAGCACAACTCCAGTGGGGCCAGCACAGCC</u><br/> <u>ACCAACTCTGAGTCCAGCACAACTCCAGTGGGGCCAGCACAGCC</u><br/> <u>ACCAACTCTGAGTCCAGCACAACTCCAGTGGGGCCAGCACAGTC</u><br/> <u>ACCAACTCTGAGTCCAGCACAACTCCAGTGGGGCCAGCACAGTC</u><br/> <u>ACCAACTCTGAGTCCAGCACAGTGTCCAGTAGGGCCAGCACTGCC</u><br/> <u>ACCAACTCTGAGTCCAGCACAACTCCAGTGGGGCCAGCACAGCC</u><br/> <u>ACCAACTCTGAGTCCAGAACGACCTCCAATGGGGCTGGCACAGCC</u><br/> <u>ACCAACTCTGAGTCCAGCACGACCTCCAGTGGGGCCAGCACAGCC</u><br/> <u>ACCAACTCTGAGTCCAGCACACCTCCAGTGGGGCCGGCACAGCC</u><br/> <u>ACCAACTCTGAGTCCAGCACAGTGTCCAGTGGGATCAGCACAGTC</u><br/> <u>ACCAACTCTGACTCCAGCACAACTCCAGTGGGGCCGGCACAGCC</u><br/> <u>ACCAACTCTGAGTCCAGCACGACCTCCAGTGGGGCCAGCACAGCC</u><br/> <u>ACCAACTCTGAGTCCAGCACAGTGTCCAGTGGGGCCAGCACAGCC</u><br/> <u>ACCAACTCTGACTCCAGCACAACTCCAGTGGGGCCGGCACAGCC</u><br/> <u>ACCAACTCTGAGTCCAGCACGACCTCCAGTGGGGCCAGCACAGCC</u><br/> <u>ACCAACTCTGAGTCCAGCACAACTCCAGTGGGGCCAGCACAGCC</u><br/> <u>ACCAACTCTGAGTCCAGCACAACTCCAGTGGGGCCAGCACAGTC</u><br/> <u>ACCAATCTGAGTCCAGCACAACTCCAGTGGGGCCAACACAGCC</u><br/> <u>ACCAACTCTGGGTCCAGTGTGACCTCTGCAGGCTCTGGAACAGCA</u><br/> <u>GCTCTGACTGGAATGCACACAAC</u><u>TCCCATAGTGCATCTACTGCA</u><br/> <u>GTGAGTGAGGCGAAGCCTGGTGGGTCCCTGGTGCCGTGGGAAATC</u><br/> <u>TTCTTCATCACCCCTGGTCTCGGTTGTGGCGGCCGTGGGGCTCTTT</u><br/> <u>GCTGGGCTCTTCTTCTGTGTGGTGTGAGTGCCATAATGTGAAGAAAA</u><br/> <u>TGCCTGGGGGAAGGAGCAGCAGAAACAC</u></p> |

**Figure S5. Complete sequences of *MUC21* exon 2.** Sequences are derived from cloned PCR products and include the entire *MUC21* PCR amplicon. Forty-five nucleotides are shown per line, highlighting the mucin domain repeat structure (underlined bases). SNPs



shown in red text. *MUC21* primers shown in bold text. **a.** Sequence of wild type *MUC21* in AR-899-19, with 27 mucin repeats. The latter SNP is heterozygous. **b.** Sequence of the mutant (c.665delC) allele in AR-899-21. The deleted nucleotide is highlighted in green. **c.** Sequence of wild type allele in AR-899-21, with 29 (2 additional) mucin repeats. Mucin repeats outlined by dotted lines do not map well to the reference sequence; thus, no SNPs within them are indicated.

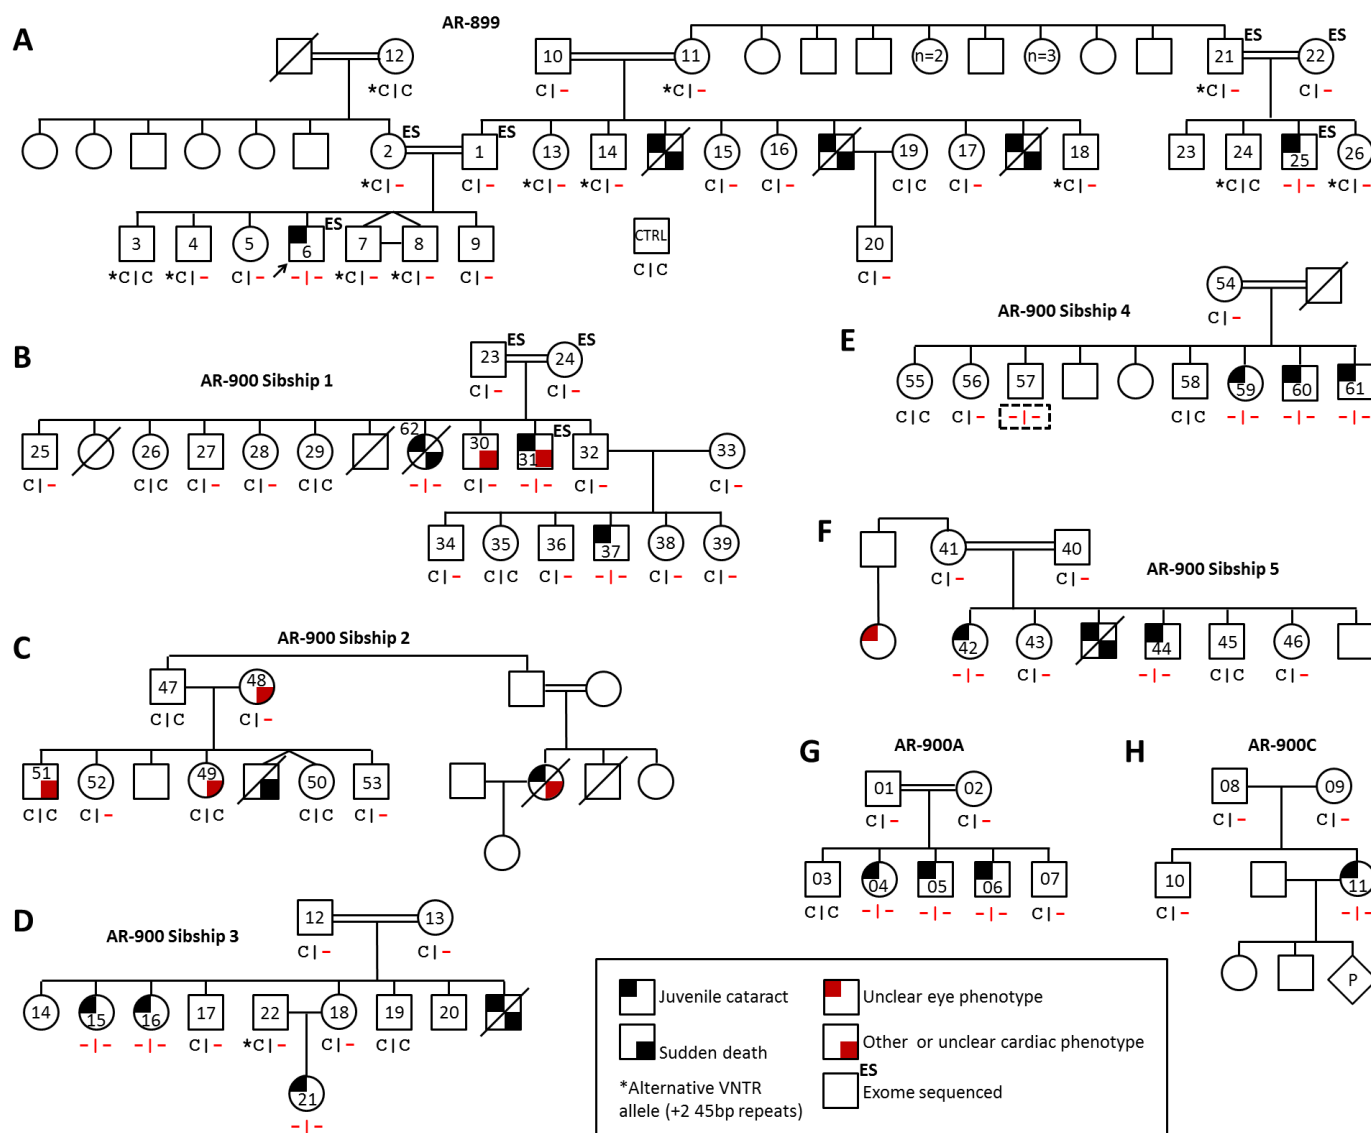

**Figure S6. Hutterite-type cataracts co-segregate imperfectly with a homozygous *MUC21* variant (c.665delC).** **a, g, h.** Families AR-899 (**a**), AR-900A (**g**), and AR-900C (**h**), and the majority of family AR-900 (**b-d, f**) demonstrate co-segregation of *MUC21* c.665delC (bold text directly below pedigree shapes; red text, mutant allele; black text, wt allele) with autosomal recessive cataracts. **e.** However, individual AR-900-57 (dotted line box) is homozygous for the mutant allele despite being phenotypically normal at age 47. Pedigrees have been trimmed to show only living generations/relevant individuals.

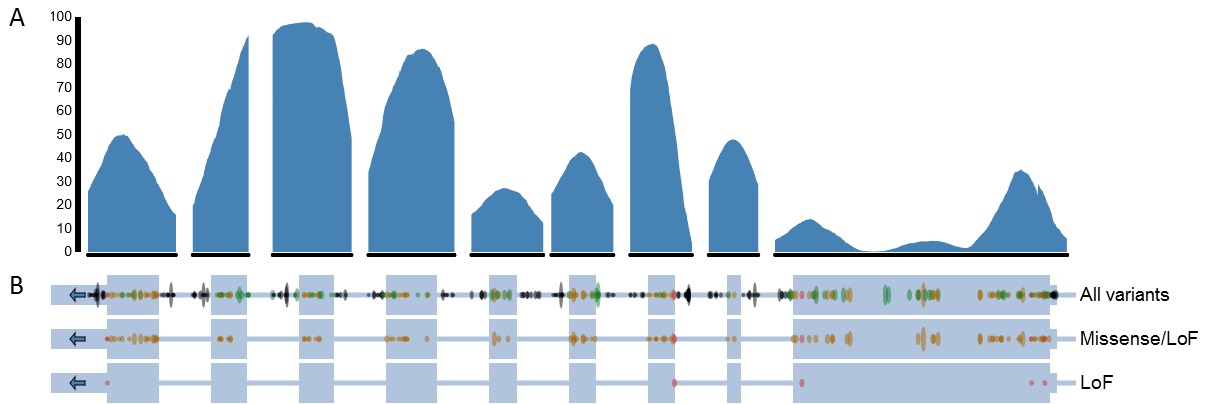

**Figure S7. *LEM2* harbors few loss-of-function alleles. a-b.** Data reproduced from the Exome Aggregation Consortium (ExAC) browser<sup>3</sup> are plotted along the coding portion of the three exons of *MUC21*. **a.** Average sequencing read depth along the gene is low in some regions. **b.** While a number of *LEM2* variants exist among the 60,706 ExAC exomes (“All variants”), loss of function variants (“LoF”) are rare.

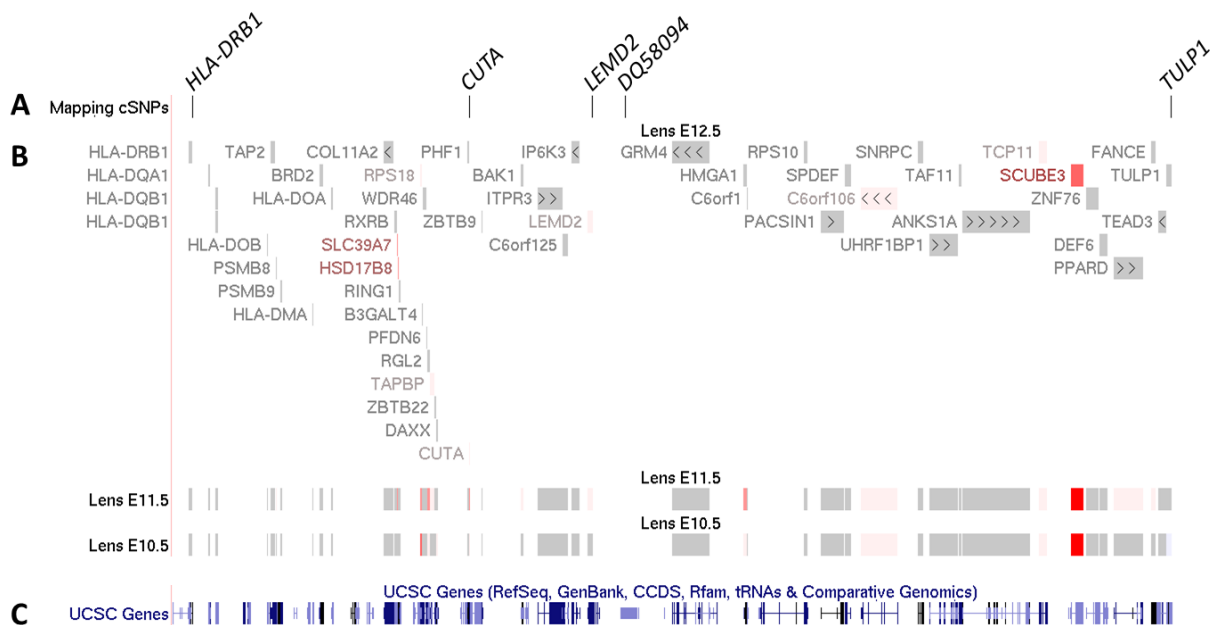

**Figure S8. *LEMD2* is among the minority of genes within chromosome 6p21.32-p21.31 expressed in the developing mouse lens.** **a.** Hutterite-type cataracts were mapped to a 0.5 Mb (between *CUTA* and *DQ58094* SNPs) to 2.9 Mb (between *HLA-DRB1* and *TULP1* SNPs) region (see Fig. 6). **b.** *LEMD2* is among a minority of genes in this region expressed in the developing mouse lens (pink to red shading), and increases in expression from E10.5 to E12.5. Data from the iSYTE browser.<sup>4</sup> **c.** There are 81 RefSeq genes in maximum region and 13 in the minimum region.<sup>5</sup>

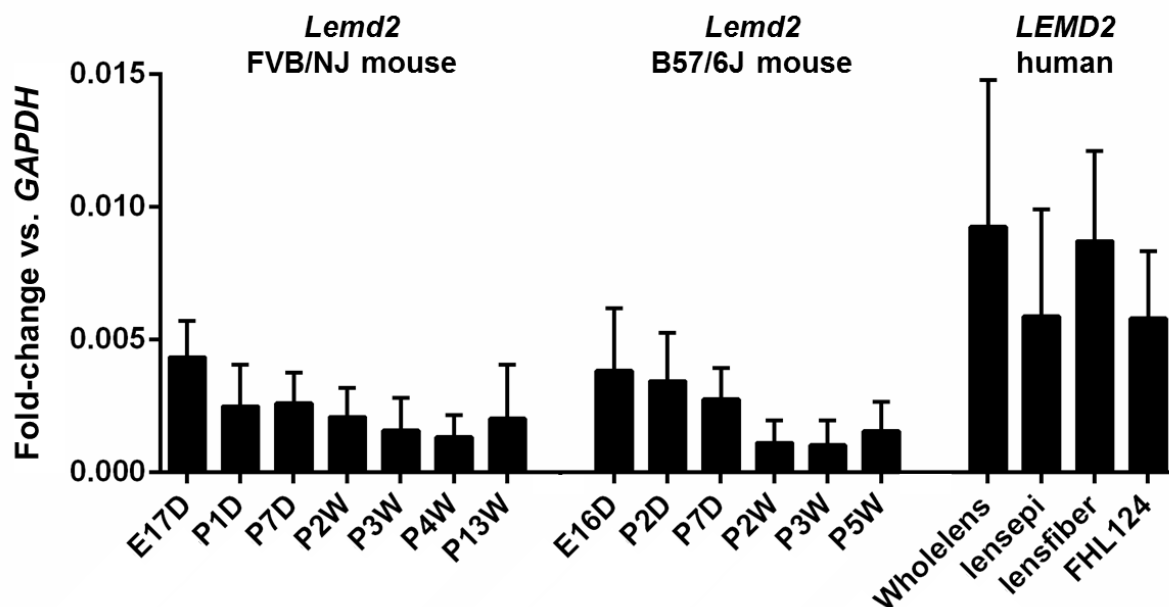

**Figure S9. Expression of *LEMD2* and its murine ortholog, *Lemd2*, in the lens.** Data are from quantitative real-time PCR, performed in quadruplicate. RT-PCR expression levels are plotted as  $\Delta\Delta C_t$  displayed as fold-change from a *GAPDH* normalization control measured in 19-day postnatal chick lens. In both FVB/NJ mouse lens (**left**) and B57/6J mouse lens (**center**), *Lemd2* expression is consistently detectable at multiple pre- and post-natal time points. *LEMD2* is expressed in human whole lens and two lens compartments (**right**), as well as in the FHL124 lens epithelium cell line. E, embryonic; P, postnatal; D, day; W, week. Error bars represent standard deviation.

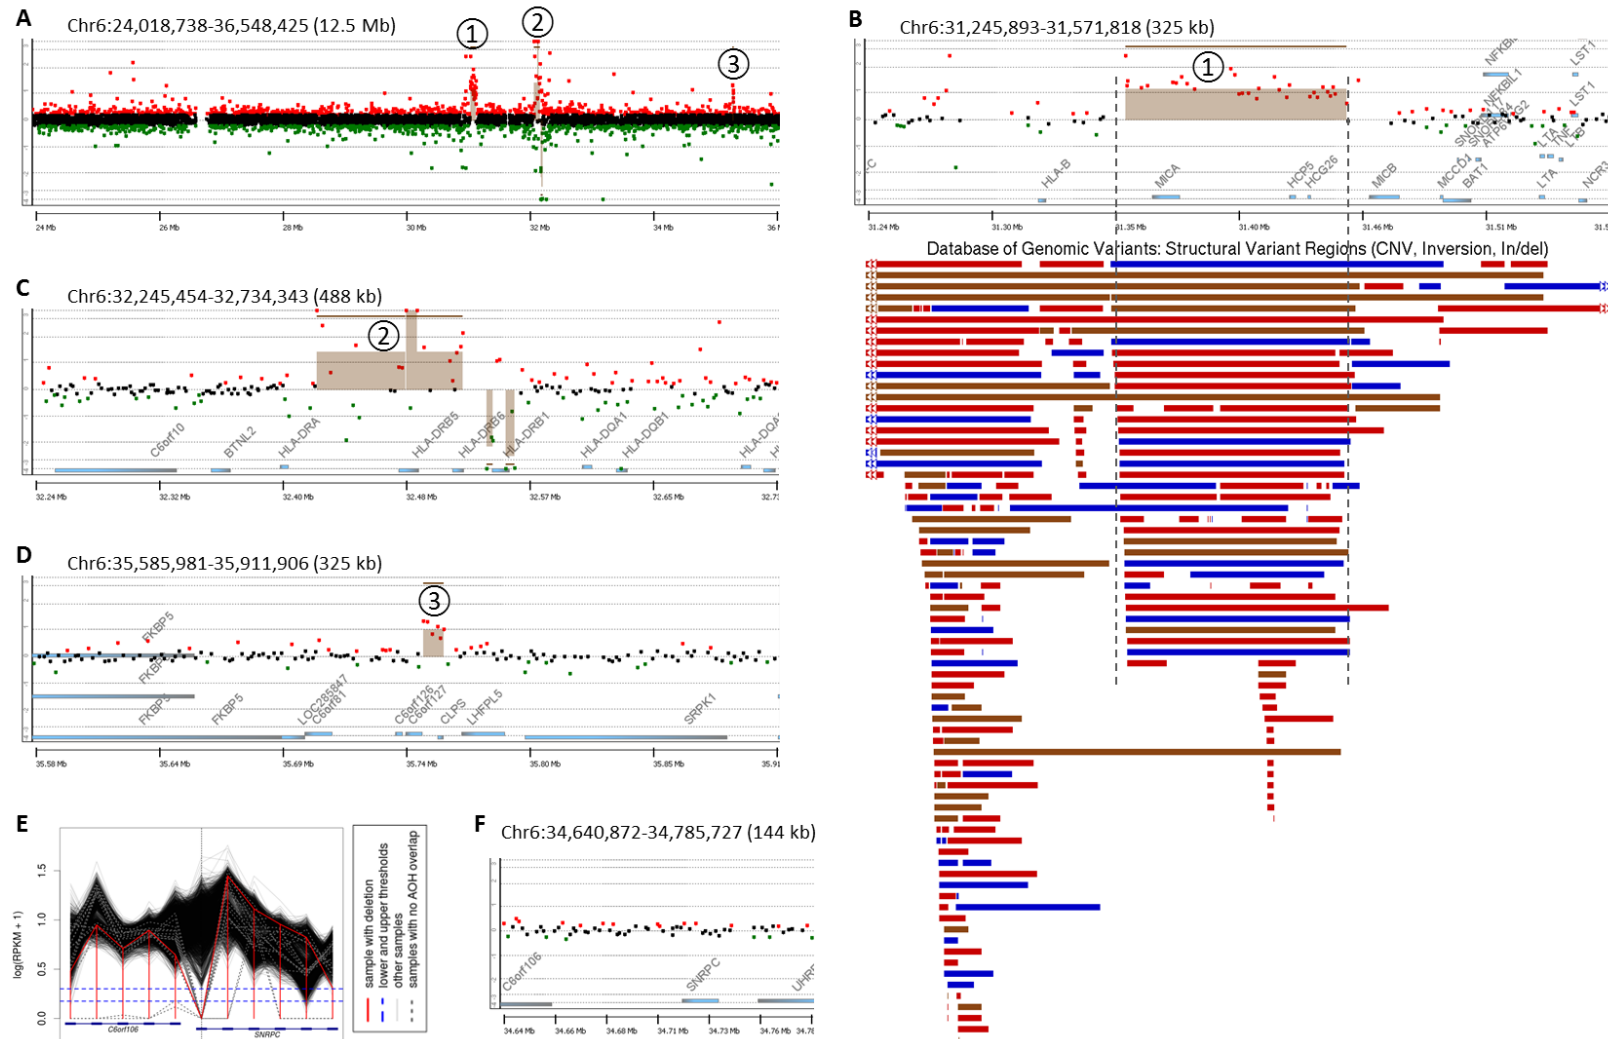

**Figure S10. CNV analysis within the 9.5 Mb region linked to Hutterite cataract reveals no potential causative CNVs. a.** A 1M probe genome-wide CGH array was run on a single affected individual, AR-899-06. In the region linked to Hutterite cataract

determined by autozygosity mapping, there are two potential CNVs (① and ②). One CNV just beyond this region (③) is also shown. **b.** CNV ① appears to be real (top) and is a homozygous duplication of a region commonly deleted and duplicated in healthy humans (bottom, “Database of Genomic Variants”) and flanked by low-copy repeats (not shown). It is outside of the narrow interval at 6p21.32-p21.31 linked to cataracts. **c.** CNV ② appears to be an artifact of the non-uniqueness of HLA genes in this region. **d.** CNV ③, which falls just outside of the linked region. **e.** Homozygous deletions were identified computationally from whole-exome sequencing data, revealing a potential single-exon deletion of *SNRPC* in AR-900-31. Read depth is indicated by the red line (AR-900-31) and black lines (4,123 other subjects). **f.** This potential CNV was not confirmed in AR-899-06 by array CGH.

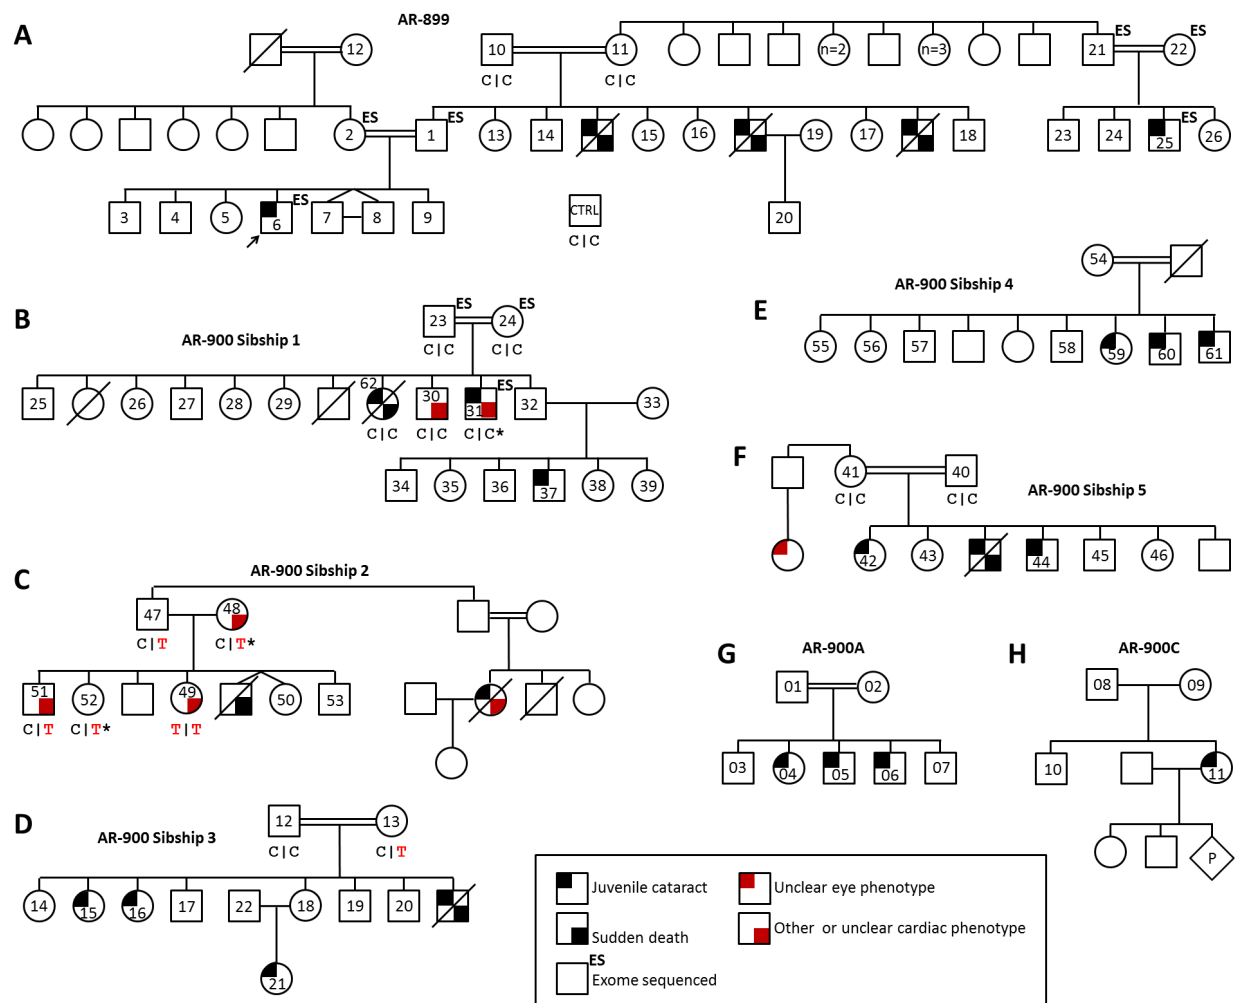

**Figure S11. *DSC2* c.C1660T does not segregate with sudden cardiac death in the majority of cataract sibships with sudden death. a-h.** Parents of individuals who died suddenly, as well as one individual experiencing sudden death (AR-900-62), were genotyped for the *DSC2* c.C1660T (p.Q554X) variant described by Gerull et al.<sup>6</sup> This variant is absent in obligate carrier parents in AR-899 and AR-900 sibships 1 and 5. Only in AR-900 sibship 2, as previously reported by Gerull et al.<sup>6</sup>, are parents each heterozygous and a homozygous individual with a cardiac phenotype is found. AR-900 sibship 3 also contains a single carrier parent. Red text, mutant allele; black text, wt allele; \*, variant confirmed by clinical testing by Gerull, et al. Pedigrees have been trimmed to show only living generations/relevant individuals.



Table S1. Characteristics of Hutterite-type cataracts in all reported individuals.

| Pedigree No. Present Manuscript | Pedigree No. Shokeir and Lowry 1985 | Pedigree No. Pearce et al. 1987. | Sex | First signs/symptoms                                                 | Initial presentation                                                                                                                                                                | Second cataract mature, if time lag                                              | Surgery and post-operative VA                                                                                                                                                                                                                                                                                                                                                                                     | Associated signs/symptoms                                                          | Negative signs/symptoms                                                                                                                                                                                                            | Biochemical analyses                                                                                                                                                                            |
|---------------------------------|-------------------------------------|----------------------------------|-----|----------------------------------------------------------------------|-------------------------------------------------------------------------------------------------------------------------------------------------------------------------------------|----------------------------------------------------------------------------------|-------------------------------------------------------------------------------------------------------------------------------------------------------------------------------------------------------------------------------------------------------------------------------------------------------------------------------------------------------------------------------------------------------------------|------------------------------------------------------------------------------------|------------------------------------------------------------------------------------------------------------------------------------------------------------------------------------------------------------------------------------|-------------------------------------------------------------------------------------------------------------------------------------------------------------------------------------------------|
| AR-900-31                       | V-9                                 | VII-10                           | M   | Infancy (looked at objects from closer distance than other children) | 6y 0m (Mature cataract in one eye and early cataract in the other)                                                                                                                  | 6y 3m (the milder cataract was found to have matured rapidly)                    | Mature cataract OS and posterior subcapsular opacity OD. Needling and aspiration OS. Three months later, R cataract was mature and operated on. Six months after initial presentation, a L retinal detachment was found which required two surgical procedures before reattachment occurred but which was complicated by a macular scar. 3 years after initial presentation, VA 20/25 R eye, counting fingers OS. | Slightly prominent frontal region, head circumference at 98 <sup>th</sup> % (55cm) | Other growth parameters were on the 50 <sup>th</sup> centile. NI psychomotor development. NI early growth and development and no visual problems. Exam 3 years after initial presentation showed nl intelligence and height.       | No urinary reducing substances or amino acids in abnormal amounts, and RBC GALK activity was nl. Erythrocyte GALT was not tested.                                                               |
| AR-900-42                       | VI-1                                | VIII-1                           | F   | Infancy (unusual appearance of pupils)                               | 5y (OD anterior and posterior subcapsular opacities, granular polychromatophilic opacities in cortex; OS mature cataract, granular polychromatophilic opacities in anterior cortex) | -                                                                                | Bilateral needling and aspiration. 20/50 OU, 20/25 with contact lenses.                                                                                                                                                                                                                                                                                                                                           | Occasional nystagmus beginning in infancy                                          | No hepatosplenomegaly. NI hair, skin, teeth, nails, hearing, neurological exam. No growth abnormalities.                                                                                                                           | No urinary Gal or other reducing substances; RBC GALK and GALT (quantitative enzyme activity) nl; serum calcium, phosphorus, alkaline phosphatase, and glucose (both fasting and postprandial). |
| AR-900-59                       | VI-19 pedigree; VI-15 text          | VII-28                           | F   | ?                                                                    | 5y (OD cataract; Clinical manifestation like that of younger brother (VI-16 in Shokeir and Lowry 1985))                                                                             | Soon after first (OS anterior subcapsular changes in cortex)                     | Both cataracts extracted. Corrected VA 20/25 OU. Nearly nl VA with correction.                                                                                                                                                                                                                                                                                                                                    | -                                                                                  | No growth abnormalities. NI intelligence and hearing and appropriate height, weight, and FOC for age. Neurologically nl.                                                                                                           | No urinary reducing substances; RBC GALK activity nl.                                                                                                                                           |
| AR-900-60                       | VI-20 pedigree; VI-16 text          | VII-29                           | M   | 3y 8m (OS pupil turned white)                                        | 3y 10m (OS fairly mature cataract, VA LP; OD VA 20/40; Visual axes straight, pupillary responses nl, corneal diameters equal and nl, no sign of uveitis or perforation)             | 4y 2m (OD rapidly developing posterior cortical cataract, which quickly matured) | Staggered bilateral needling and aspiration. OS VA 20/40. Similar OD. "Later, a secondary membrane (remnants of the posterior capsule) was found to have developed in the pupillary area [of both eyes] and required repeated needling." Corrected distance VA OD 20/20 and OS 20/25. IOP nl OU.                                                                                                                  | Allergies, penicillin sensitivity                                                  | Growth, development, general health, hair, nails, teeth nl. No myotonia. Height 50 <sup>th</sup> centile, weight and FOC 75 <sup>th</sup> %. No ocular trauma. NI intelligence and hearing, appropriate weight. Neurologically nl. | Urine Gal and RBC GALK enzyme assay nl. Serum calcium, phosphorus, alkaline phosphatase, and blood glucose nl. No urinary reducing substances.                                                  |

VA; visual acuity; Gal, galactose; GALK, galactokinase; GALT, galactose-1-phosphate uridyltransferase; RBC, red blood cell; NI, normal; LP, light perception; OS, left eye; OD, right eye; OU, both eyes; - not performed or unknown. Reproduced in part from <sup>7</sup> and <sup>8</sup>.

Table S1, cont'd.

| Pedigree No. Present Manuscript | Pedigree No. Shokeir and Lowry 1985 | Pedigree No. Pearce et al. 1987. | Sex | First signs/symptoms | Initial presentation                           | Second cataract mature, if time lag              | Surgery and post-operative VA                                                                                                                                                                                        | Associated signs/symptoms | Negative signs/symptoms                                                                                                                                                    | Biochemical analyses                                                                                                                                                                                             |
|---------------------------------|-------------------------------------|----------------------------------|-----|----------------------|------------------------------------------------|--------------------------------------------------|----------------------------------------------------------------------------------------------------------------------------------------------------------------------------------------------------------------------|---------------------------|----------------------------------------------------------------------------------------------------------------------------------------------------------------------------|------------------------------------------------------------------------------------------------------------------------------------------------------------------------------------------------------------------|
| AR-900-61                       | VI-21 pedigree; VI-17 text          | VII-30                           | M   | ?                    | 4y (OU mature cataracts)                       | -                                                | Following surgery, secondary membranes developed OU requiring secondary membranectomy. No postoperative VA known.                                                                                                    | -                         | No clinical or growth abnormalities. NI intelligence and hearing and appropriate height, weight, and FOC for age. Neurologically nl.                                       | No metabolic disorder. No urinary reducing substances; RBC GALK activity nl.                                                                                                                                     |
| AR-900-62                       | V-8                                 | VII-8                            | F   | 4y                   | 4y 1m (OD mature cataract; OS early opacities) | 4y 5m (OS mature) very dense, mature cataract(s) | Needling of both. Subsequent needlings of thickened posterior capsule were necessary. Postoperative VA 20/25 OU.                                                                                                     | -                         | NI early growth and development with no visual problems. At age 11y nl intelligence and height. Examination then showed no abnormalities apart from those related to eyes. | No urinary reducing substances or amino acids. RBC GALK activity nl. Quantitative determination of uronic acids were somewhat elevated, but results of GAG electrophoresis were nl. Erythrocyte GALT not tested. |
| AR-900, sibship 2               | -                                   | IX-1                             | F   | ?                    | 3y 10m (First cataract mature)                 | 3y 11m                                           | Mature L cataract. R lens showed single anterior subcapsular vacuole but no opacities. L needling and aspiration. By five weeks after initial exam, R cataract was mature and surgerized. No postoperative VA known. | -                         | NI growth and development, head circumference 75 <sup>th</sup> centile.                                                                                                    | -                                                                                                                                                                                                                |

VA; visual acuity; Gal, galactose; GALK, galactokinase; GALT, galactose-1-phosphate uridylyltransferase; RBC, red blood cell; NI, normal; LP, light perception; OS, left eye; OD, right eye; OU, both eyes; - not performed or unknown. Reproduced in part from <sup>7</sup> and <sup>8</sup>.

Table S1, cont'd.

|           |   |   |   |    |                                                                                                                                                                                                                                                                                                                                                                                                                                                                                                                                                                                                                                    |                                                                                                                                                                                                                                                         |                                                                                                                                                                                      |                                                                                                                                                                                                                |   |   |
|-----------|---|---|---|----|------------------------------------------------------------------------------------------------------------------------------------------------------------------------------------------------------------------------------------------------------------------------------------------------------------------------------------------------------------------------------------------------------------------------------------------------------------------------------------------------------------------------------------------------------------------------------------------------------------------------------------|---------------------------------------------------------------------------------------------------------------------------------------------------------------------------------------------------------------------------------------------------------|--------------------------------------------------------------------------------------------------------------------------------------------------------------------------------------|----------------------------------------------------------------------------------------------------------------------------------------------------------------------------------------------------------------|---|---|
| 899-06    | - | - | M | ?  | 7y 0m (Referring optometrist noted "cortical spokes" in both eyes with a posterior subcapsular cataract OD). (At 7y 4m, ophthalmologist noted OD lens to have a mild degree of anterior subcapsular haze and a diffuse, white haze that extended from the posterior face of the lens anteriorly to approximately the central plane of the lens. This haze had an iridescent quality. OS lens showed a trace of diffuse haziness posteriorly. This was not the crystalline appearance of a typical posterior subcapsular cataract but rather a diffuse white haze in that area of the lens. There was no iridescence in this lens.) | 7y 9m (OS lens appeared much as OD lens had been at the initial presentation. A mild, white anterior subcapsular haze was present with a much denser posterior haze – similar in appearance to OD lens 5 months previously though with no iridescence.) | Cataract surgery and placement of an IOL. OD at 7y 4m; during aspiration of the lens it had the normal soft consistency typically encountered in a patient of this age. OS at 7y 9m. | R cornea showed a jagged scar infero-temporally that appeared to be nearly full thickness. There were no other signs of ocular trauma and the family and patient had no recollection of any injury to the eye. | - | - |
| AR-900-04 | - | - | F | 5y | ?                                                                                                                                                                                                                                                                                                                                                                                                                                                                                                                                                                                                                                  | ?                                                                                                                                                                                                                                                       | ?                                                                                                                                                                                    | -                                                                                                                                                                                                              | - | - |
| AR-900-05 | - | - | M | 4y | ?                                                                                                                                                                                                                                                                                                                                                                                                                                                                                                                                                                                                                                  | ?                                                                                                                                                                                                                                                       | ?                                                                                                                                                                                    | -                                                                                                                                                                                                              | - | - |
| AR-900-06 | - | - | M | ?  | 3y 7m (diffuse, white haziness in the posterior 1/3 to 1/2 of OD lens. OS lens was completely white.)                                                                                                                                                                                                                                                                                                                                                                                                                                                                                                                              | -                                                                                                                                                                                                                                                       | At the time of surgery both lenses were soft and aspirated easily.                                                                                                                   | -                                                                                                                                                                                                              | - | - |
| AR-900-21 | - | - | F | ?  | ?                                                                                                                                                                                                                                                                                                                                                                                                                                                                                                                                                                                                                                  | ?                                                                                                                                                                                                                                                       | Cataract surgery at age 5.                                                                                                                                                           | -                                                                                                                                                                                                              | - | - |

VA; visual acuity; Gal, galactose; GALK, galactokinase; GALT, galactose-1-phosphate uridyltransferase; RBC, red blood cell; NI, normal; LP, light perception; OS, left eye; OD, right eye; OU, both eyes; - not performed or unknown. Reproduced in part from <sup>7</sup> and <sup>8</sup>.

**Table S2. Primer sequences**

|                        |                        |
|------------------------|------------------------|
| LRRC16A F1             | TTTGGGCTGCTGACAGATTT   |
| LRRC16A R1             | GCTTCTGGGAAGAAGGAAGG   |
| HIST1H2AD F1           | GACTCGCTCGGAGTAGTTGC   |
| HIST1H2AD R1           | TCCTCACTCTGCAGCTGGTA   |
| HIST1H2BN F1           | ACAAGGTGCTGAAGCAGGTC   |
| HIST1H2BN R1           | TGCCAGTTCTCTTTGGGAAG   |
| OR2J3 F2               | CCTCCTTCACCTTCTGGGTA   |
| OR2J3 R2               | TCTTCACTGCCCCCTCTTACAA |
| TRIM40 F1              | TTCAGGTAGACCACGGGAAC   |
| TRIM40 R1              | CCTCTTCTGTGCCCATTTCTG  |
| ABCF1 F1               | TGCCCTTCAGAATGTGAGGTG  |
| ABCF1 R1               | AGAGGGCAGGAAGAAAAGGAG  |
| MUC21 F2               | TTCAGCAACAAAATCCAATGAG |
| MUC21 R2               | GTGTTTCTGCTGCTCCTTCC   |
| PSORS1C1 F1            | CCGTTCACTTGACCCACTTT   |
| PSORS1C1 R1            | TTTGGGGTGATGAGGGATAC   |
| HLA-C F1               | CCCGGGAGATCTATAGGAGA   |
| HLA-C R1               | CCGGTTTCATTTTCGGTTTA   |
| LY6G5C F1              | GCAGCTTAGGAGGCTGAGAG   |
| LY6G5C R1              | GCAGTGGTAGGGTGTGAGGT   |
| DDAH2 F1               | ACTCTTCCAGCCAGCTCAGA   |
| DDAH2 R1               | CTGCATGTGATTCCAAGGTG   |
| VWA7 F1                | CCGGGAACCCTACAGTGAA    |
| VWA7 R1                | GAATGAGGGGAGCTCTTTC    |
| EHMT2 F1               | GAAAACAGGCAAGCAAAAAGG  |
| EHMT2 R1               | ACCGTCACCTTCCCTAAACA   |
| HLA-DRB1 F1            | CCTATTTTCCCCACCCATA    |
| HLA-DRB1 R1            | AGACTTGCCTGCTTCTCTGG   |
| CUTA F2                | AGAGACCCAAAGACGGGATT   |
| CUTA R2                | AAGGGAGTGGGTCTTTTGG    |
| LEMD2 F1               | GCTTGTGCGGTAGACATCC    |
| LEMD2 R2               | TTAATCCCCCTTGACCTTC    |
| DQ580984 F1            | GGCTTCTAGTTTGCGGTTCA   |
| DQ580984 R1            | GGCTTCCGTCTCCATAGTA    |
| TULP1 F1               | CACGGGCTACCAGAAAAGGT   |
| TULP1 R1               | GGAGATCCCTAGGGTGAGGA   |
| DSC2 F1                | CCCTGAGTGTAACCCTCCAA   |
| DSC2 R1                | CAGAGTGCATGTATCCAGCTT  |
| CTRL F (SR)            | TCCACAGGGTGACTGTGAAA   |
| CTRL R (SR)            | TAGGGACACCTGGGAATTTG   |
| M13 forward            | GTAAAACGACGGCCAG       |
| M13 reverse            | GTAAAACGACGGCCAG       |
| Lemd2 forward (RT-PCR) | GTGGGTGAAGATGGGCAAG    |
| Lemd2 reverse (RT-PCR) | GTGCAGCAGCTCCAACAG     |
| Gapdh forward (RT-PCR) | CGTCCCCTAGACAAAATGGT   |
| Gapdh reverse (RT-PCR) | TCAATGAAGGGGTTCGTTGAT  |
| LEMD2 forward (RT-PCR) | CTGTCAGGCCAAGCAGAAG    |
| LEMD2 reverse (RT-PCR) | GGCTTCCATAACAGGAATGC   |
| GAPDH forward (RT-PCR) | AGGGCTGCTTTTAACTCTGGT  |
| GAPDH reverse (RT-PCR) | GACAAGCTTCCCCTTCTCAG   |

**Table S3. cSNPs used to fine-map the cataract locus within 6p22.2-p21.31.**

| No. | Position (hg19) | Ref | Var | Gene             | dbSNP142    | dbSNP allele freq <sup>1</sup> (via UCSC) | ExAC allele freq <sup>1</sup> | ExAC homozygotes <sup>1</sup> |
|-----|-----------------|-----|-----|------------------|-------------|-------------------------------------------|-------------------------------|-------------------------------|
| 1   | chr6:25420350   | A   | C   | <i>LRRC16A</i>   | rs41271807  | 0.11541                                   | 0.1486                        | 1499                          |
| 2   | chr6:26199454   | C   | T   | <i>HIST1H2AD</i> | rs41266803  | 0.05511                                   | 0.05406                       | 176                           |
| 3   | chr6:27806827   | C   | T   | <i>HIST1H2BN</i> | rs112586220 | 0.00280                                   | 0.01588                       | 35                            |
| 4   | chr6:29080344   | C   | A   | <i>OR2J3</i>     | rs3749977   | 0.18580                                   | 0.2972                        | 5879                          |
| 5   | chr6:30114955   | C   | T   | <i>TRIM40</i>    | rs757262    | 0.08896                                   | 0.2100                        | 3061                          |
| 6   | chr6:30558125   | C   | T   | <i>ABCF1</i>     | -           | -                                         | -                             | -                             |
| 7   | chr6:30954617   | C   | del | <i>MUC21</i>     | -           | -                                         | -                             | -                             |
| 8   | chr6:31106489   | G   | A   | <i>PSORS1C1</i>  | rs1265096   | 0.00849                                   | 0.05191                       | 309                           |
| 9   | chr6:31239050   | G   | T   | <i>HLA-C</i>     | rs713032    | 0.23822                                   | 0.1410                        | 1524                          |
| 10  | chr6:31647001   | A   | G   | <i>LY6G5C</i>    | rs11575852  | 0.00948                                   | 0.02715                       | 67                            |
| 11  | chr6:31695368   | G   | A   | <i>DDAH2</i>     | rs11540321  | 0.01038                                   | 0.03238                       | 129                           |
| 12  | chr6:31737818   | C   | G   | <i>VWA7</i>      | rs115526889 | 0.00399                                   | 0.01896                       | 42                            |
| 13  | chr6:31864538   | G   | A   | <i>EHMT2</i>     | rs115884658 | 0.00280                                   | 0.01811                       | 45                            |
| 14  | chr6:32557483   | C   | T   | <i>HLA-DRB1</i>  | rs9270303   | 0.22085                                   | 0.2317                        | ?                             |
| 15  | chr6:33384473   | C   | T   | <i>CUTA</i>      | rs41267649  | 0.00559                                   | 0.02032                       | 57                            |
| 16  | Chr6:33756856   | A   | C   | <i>LEMD2</i>     | -           | -                                         | -                             | -                             |
| 17  | chr6:33851052   | C   | A   | <i>DQ580984</i>  | rs11759059  | 0.13119                                   | -                             | -                             |
| 18  | chr6:35479574   | G   | C   | <i>TULP1</i>     | rs7764472   | 0.87440                                   | 0.8602                        | 14180                         |

<sup>1</sup>As of 16 Mar 2015

**Table S4. Loss of Function Alleles in *LEMD2* in the Exome Aggregation Consortium (ExAC) Browser**

| Variant           | Chr | Position | Protein Consequence | Filter | Annotation      | Allele Count | Allele Number | Number of Homozygotes | Allele Frequency   |
|-------------------|-----|----------|---------------------|--------|-----------------|--------------|---------------|-----------------------|--------------------|
| 6:33740410 G / A  | 6   | 33740410 | p.Arg503Ter         | PASS   | stop gained     | 1            | 119494        | 0                     | 0.000008369        |
| 6:33752205 C / A  | 6   | 33752205 |                     | PASS   | splice acceptor | 7            | 120066        | 0                     | 0.00005830         |
| 6:33756184 G / C  | 6   | 33756184 | p.Ser237Ter         | PASS   | stop gained     | 1            | 22918         | 0                     | 0.00004363         |
| 6:33756842 AG / A | 6   | 33756842 | p.Phe18SerfsTer98   | PASS   | frameshift      | 1            | 102828        | 0                     | 0.000009725        |
| 6:33756880 G / T  | 6   | 33756880 | p.Ser5Ter           | PASS   | stop gained     | 1            | 92256         | 0                     | 0.00001084         |
|                   |     |          |                     |        |                 |              |               | <b>Total:</b>         | <b>0.000130864</b> |

Data reproduced from <sup>3</sup>.

**Table S5. Genes within the 2.9 Mb linked region that are expressed in mouse lens (data from Hoang et al.<sup>9</sup>).**

| Start (Chr6) | Stop (Chr6) | Gene         |
|--------------|-------------|--------------|
| 32578769     | 32589836    | HLA-DRB1     |
| 32637392     | 32654685    | HLA-DQA1     |
| 32659464     | 32666689    | HLA-DQB1     |
| 32706144     | 32706803    | MTCO3P1      |
| 32741386     | 32746887    | HLA-DQA2     |
| 32749912     | 32749979    | MIR3135B     |
| 32756098     | 32763553    | HLA-DQB2     |
| 32812763     | 32817048    | HLA-DOB      |
| 32821833     | 32838770    | TAP2         |
| 32840717     | 32844935    | PSMB8        |
| 32844086     | 32846500    | PSMB8-AS1    |
| 32845209     | 32853971    | TAP1         |
| 32854161     | 32859851    | PSMB9        |
| 32876478     | 32880074    | PPP1R2P1     |
| 32894176     | 32903758    | LOC100294145 |
| 32896402     | 32896489    | HLA-Z        |
| 32934629     | 32941070    | HLA-DMB      |
| 32948614     | 32953122    | HLA-DMA      |
| 32968660     | 32981505    | BRD2         |
| 33004182     | 33009612    | HLA-DOA      |
| 33064569     | 33080778    | HLA-DPA1     |
| 33075926     | 33089696    | HLA-DPB1     |
| 33079299     | 33080011    | RPL32P1      |
| 33091482     | 33093314    | HLA-DPA2     |
| 33103693     | 33107144    | COL11A2P1    |
| 33112516     | 33129113    | HLA-DPB2     |
| 33131197     | 33131343    | HLA-DPA3     |
| 33162692     | 33192468    | COL11A2      |
| 33193585     | 33200696    | RXRΒ         |
| 33199601     | 33199692    | RNY4P10      |
| 33200826     | 33204437    | SLC39A7      |
| 33204637     | 33206831    | HSD17B8      |
| 33207835     | 33207944    | MIR219A1     |
| 33208509     | 33212722    | RING1        |
| 33215574     | 33216183    | ZNF70P1      |
| 33249536     | 33254890    | HCG25        |
| 33250272     | 33271965    | VPS52        |
| 33272075     | 33276504    | RPS18        |
| 33277140     | 33278825    | B3GALT4      |
| 33278905     | 33289527    | WDR46        |
| 33287227     | 33287289    | MIR6873      |
| 33289597     | 33290934    | PFDN6        |
| 33290245     | 33290325    | MIR6834      |
| 33291654     | 33299460    | RGL2         |
| 33299694     | 33314387    | TAPBP        |
| 33314405     | 33317942    | ZBTB22       |
| 33318558     | 33323016    | DAXX         |
| 33323628     | 33324116    | LOC102723452 |
| 33338978     | 33339495    | MYL8P        |
| 33364724     | 33366362    | LYPLA2P1     |
| 33389356     | 33389479    | RPL35AP4     |

Yellow, expressed. Grey, not expressed.

Table S5, cont'd.

|          |          |              |
|----------|----------|--------------|
| 33391536 | 33409924 | KIFC1        |
| 33400015 | 33400644 | RPL12P1      |
| 33410996 | 33416453 | PHF1         |
| 33416542 | 33418288 | CUTA         |
| 33420070 | 33453689 | SYNGAP1      |
| 33438331 | 33438437 | MIR5004      |
| 33454579 | 33457544 | ZBTB9        |
| 33572546 | 33580296 | BAK1         |
| 33583699 | 33589026 | GGNBP1       |
| 33586106 | 33593338 | LINC00336    |
| 33621379 | 33696574 | ITPR3        |
| 33631244 | 33633636 | LOC101929188 |
| 33696761 | 33711751 | UQCC2        |
| 33698128 | 33698234 | MIR3934      |
| 33721638 | 33746985 | IP6K3        |
| 33771213 | 33789129 | LEMD2        |
| 33794672 | 33804016 | MLN          |
| 33889511 | 33896907 | LINC01016    |
| 33899135 | 33899200 | MIR7159      |
| 33911102 | 33918208 | LOC100653005 |
| 33999972 | 34000051 | MIR1275      |
| 34018643 | 34155622 | GRM4         |
| 34189732 | 34191141 | KRT18P9      |
| 34219372 | 34220937 | CYCSP55      |
| 34236800 | 34246231 | HMGA1        |
| 34240673 | 34240736 | MIR6835      |
| 34246380 | 34249108 | C6orf1       |
| 34263270 | 34263723 | RPL35P2      |
| 34277591 | 34284549 | LOC102723521 |
| 34287194 | 34392680 | NUDT3        |
| 34287194 | 34426125 | RPS10-NUDT3  |
| 34417454 | 34426125 | RPS10        |
| 34466061 | 34535223 | PACSIN1      |
| 34537802 | 34556333 | SPDEF        |
| 34576101 | 34576757 | LOC100101247 |
| 34587280 | 34696850 | C6orf106     |
| 34616522 | 34617324 | RPL7P25      |
| 34696944 | 34697470 | LOC101929243 |
| 34744140 | 34744718 | RPS10P13     |
| 34757094 | 34773857 | SNRPC        |
| 34792017 | 34880152 | UHRF1BP1     |
| 34877778 | 34888071 | TAF11        |
| 34889261 | 35091413 | ANKS1A       |
| 35118071 | 35141641 | TCPI1        |
| 35150678 | 35163658 | LOC101929263 |
| 35214047 | 35253079 | SCUBE3       |
| 35228299 | 35259444 | LOC101929285 |
| 35259488 | 35295985 | ZNF76        |
| 35297818 | 35321771 | DEF6         |
| 35342558 | 35428191 | PPARD        |
| 35446210 | 35449865 | MKRN6P       |
| 35452339 | 35467141 | FANCE        |
| 35468401 | 35470781 | RPL10A       |
| 35470508 | 35470579 | MIR7111      |
| 35473597 | 35497084 | TEAD3        |
| 35497874 | 35512902 | TULP1        |

Yellow, expressed. Grey, not expressed.



**References:**

1. Carr IM, Bhaskar S, O' Sullivan J, et al. Autozygosity mapping with exome sequence data. *Hum Mutat* 2013;34(1):50-6.
2. Miller JN, Pearce DA. Nonsense-mediated decay in genetic disease: friend or foe? *Mutat Res Rev Mutat Res* 2014;762:52-64.
3. Exome Aggregation Consortium. Exome Aggregation Consortium (ExAC) Browser. 2014.
4. Lachke SA, Ho JW, Kryukov GV, et al. iSyTE: integrated Systems Tool for Eye gene discovery. *Invest Ophthalmol Vis Sci* 2012;53(3):1617-27.
5. OMIM. Online Mendelian Inheritance in Man.
6. Gerull B, Kirchner F, Chong JX, et al. Homozygous founder mutation in desmocollin-2 (*DSC2*) causes arrhythmogenic cardiomyopathy in the Hutterite population. *Circ Cardiovasc Genet* 2013;6(4):327-36.
7. Shokeir MHK, Lowry RB. Juvenile cataract in Hutterites. *Am J Med Genet* 1985;22(3):495-500.
8. Pearce WG, Mackay JA, Holmes TM, et al. Autosomal recessive juvenile cataract in Hutterites. *Ophthalmic Paediatr Genet* 1987;8(2):119-24.
9. Hoang TV, Kumar PKR, Sutharzan S, et al. Comparative transcriptome analysis of epithelial and fiber cells in newborn mouse lenses with RNA sequencing. *Mol Vis* 2014;20:1491-517.
